1 **Lysophosphatidic acid-mediated GPR35 signaling in CX3CR1<sup>+</sup> macrophages**  
2 **regulates the intestinal cytokine milieu**

3

4 Berna Kaya<sup>1</sup>, Cristian Doñas Cuadra<sup>2,3</sup>, Philipp Wuggenig<sup>1</sup>, Oscar E. Diaz<sup>2,3</sup>, Rodrigo A.  
5 Morales<sup>2,3</sup>, Hassan Melhem<sup>1</sup>, Swiss IBD Cohort Investigators, Pedro P. Hernández<sup>4</sup>, Tanay  
6 Kaymak<sup>1</sup>, Srustidhar Das<sup>2,3</sup>, Petr Hruz<sup>5</sup>, C. Korcan Ayata<sup>1</sup>, Eduardo J. Villablanca<sup>2,3,6,7,\*</sup>, Jan  
7 Hendrik Niess<sup>1,5,6,\*</sup>

8

9 <sup>1</sup>Department of Biomedicine, University of Basel, 4031 Basel, Switzerland

10 <sup>2</sup>Division of immunology and Allergy, Department of Medicine, Solna, Karolinska Institutet  
11 and University Hospital, 17176 Stockholm, Sweden

12 <sup>3</sup>Center of Molecular Medicine, 17176 Stockholm, Sweden

13 <sup>4</sup>Institut Curie, PSL Research University, INSERM U934/CNRS UMR3215, Development of  
14 Mucosal Immunity and Tissue Integrity Group, 75248, Paris, France

15 <sup>5</sup>University Center for Gastrointestinal and Liver Diseases, St. Clara Hospital and University  
16 Hospital of Basel, 4031 Basel, Switzerland

17 <sup>6</sup>These authors contributed equally

18 <sup>7</sup>Lead contact

19

20 \*Correspondence: [janhendrik.niess@clarunis.ch](mailto:janhendrik.niess@clarunis.ch) (J.H.N.), [eduardo.villablanca@ki.se](mailto:eduardo.villablanca@ki.se) (E.J.V.)

21 **Highlights**

22

- 23 1. Inflammatory cues and the microbiota modulate *Gpr35* expression across species
- 24
- 25 2. LPA modulates GPR35-dependent functions in zebrafish and mice macrophages
- 26
- 27 3. GPR35 expressing macrophages have a protective role during intestinal inflammation
- 28
- 29 4. GPR35 control intestinal inflammation by inducing TNF and corticosterone synthesis
- 30

31 **eTOC Blurb**

32 GPR35 have been associated with IBD, but how GPR35 may influence macrophage-mediated

33 intestinal homeostasis remains unclear. Using zebrafish and mice genetic tools, Niess,

34 Villablanca, and colleagues have identified that LPA triggers GPR35 activity, and loss of

35 macrophage GPR35 signaling confers intrinsic dysfunctions with effects on cytokine

36 production and intestinal homeostasis.

37

38 **Summary**

39 Single nucleotide polymorphisms in the gene encoding G protein-coupled receptor 35  
40 (GPR35) are associated with increased risk of inflammatory bowel disease. However, the  
41 mechanism(s) by which GPR35 modulates the intestinal milieu remain undefined. Here we  
42 demonstrate in zebrafish and mice that expression of *Gpr35* is microbiota-dependent and is  
43 enhanced upon inflammation. We identify a GPR35<sup>+</sup> colonic macrophage population in mice  
44 that is characterized by increased production of pro-inflammatory cytokines, and determine  
45 that lysophosphatidic acid (LPA) acts as an endogenous GPR35 ligand to induce *Tnf*  
46 expression. Mice lacking *Gpr35* in CX3CR1<sup>+</sup> macrophages have aggravated colitis when  
47 exposed to dextran sodium sulfate, have decreased transcript levels of the corticosterone-  
48 generating gene *Cyp11b1*, and reduced levels of macrophage-derived TNF. Administration of  
49 TNF in these mice restores *Cyp11b1* expression and intestinal corticosterone production, and  
50 ameliorates DSS-induced colitis. These findings suggest that LPA signals through GPR35 in  
51 CX3CR1<sup>+</sup> macrophages to control the intestinal cytokine milieu.

52

53 **Keywords:** GPR35, lysophosphatidic acid, macrophages, colitis

## 54 **Introduction**

55 Host- and/or bacterial-derived metabolites orchestrate a wide range of immune responses  
56 through G protein-coupled receptors (GPCRs) (Melhem et al., 2019; Postler and Ghosh, 2017;  
57 Thorburn et al., 2014). Genome-wide association studies (GWASs) have identified single  
58 nucleotide polymorphisms in the coding region of *GPR35* that are associated with increased  
59 risk of ulcerative colitis (UC) and primary sclerosing cholangitis (Ellinghaus et al., 2013;  
60 Imielinski et al., 2009). Structural modeling studies have suggested that protein-coding  
61 variant rs3749171, which lead to the amino acid substitution T108M, may affect the ability of  
62 GPR35 to become activated (Ellinghaus et al., 2013); however, how defective GPR35  
63 signaling influence intestinal immune homeostasis is yet poorly understood. The endogenous  
64 ligand for GPR35 also remains undefined, although the chemokine CXCL17, the tryptophan  
65 metabolite kynurenic acid (KYNA), and the phospholipid derivative lysophosphatidic acid  
66 (LPA) have been suggested as putative ligands (Maravillas-Montero et al., 2015; Oka et al.,  
67 2010; Wang et al., 2006). Illustrating the complexity of the signaling pathway, some studies  
68 have suggested that specific ligands might activate GPR35 in a context- and species-  
69 dependent manner. For example, CXCL17 did not activate migration of GPR35-expressing  
70 cells in one study (Binti Mohd Amir et al., 2018). Furthermore, KYNA has a wide spectrum  
71 of potency for GPR35 across species, with low potency in humans when applied in  
72 micromolar concentrations (Mackenzie et al., 2011), and LPA has not been experimentally  
73 pursued as a potential GPR35 ligand following the initial suggestion of its role in elevating  
74 intracellular Ca(2+) concentrating and inducing receptor internalization (Oka et al., 2010).  
75 Thus, the putative GPR35 ligand that might control immune responses in vivo, remain to be  
76 identified.

77  
78 In the intestine GPR35 is highly expressed in the intestinal epithelium and macrophages both  
79 in human and mice (Lattin et al., 2008), and activation of GPR35 promotes intestinal

80 epithelial cell turnover during wound healing (Schneditz et al., 2019; Tsukahara et al., 2017).  
81 Although these studies used well-known synthetic GPR35 agonists, it remains to be  
82 demonstrated if the effect is GPR35 specific both in vitro and in vivo. Kaneider N.C. and  
83 colleagues have recently shown that *Gpr35*-deficient compared to control mice resulted in  
84 decreased inflammation-associated intestinal tumorigenesis (Schneditz et al., 2019; Tsukahara  
85 et al., 2017). In addition, *Gpr35*<sup>-/-</sup> intestinal epithelial cells resulted in reduced turnover  
86 compared to control mice, as seen by proliferation analysis in situ and in organoids cultures  
87 (Schneditz et al., 2019; Tsukahara et al., 2017). Thus, indicating the GPR35 might orchestrate  
88 homeostatic epithelial cell renewal. Moreover, in agreement with a role in IEC turnover,  
89 GPR35 is protective during chemically induced acute colonic inflammation in mice (Farooq  
90 et al., 2018). However, the endogenous ligand and cell type triggering GPR35 signaling to  
91 maintain intestinal homeostasis remains unknown.

92

93 Several lines of evidence have implicated macrophages in inflammatory bowel disease (IBD).  
94 For example, multiple IBD risk genes play critical roles in macrophages functions, such as  
95 bacterial clearance (e.g. *Gpr65* and *Nod2*) (Hedl and Abraham, 2011; Lassen et al., 2016;  
96 Peters et al., 2017). Importantly, the critical role of macrophages in the establishment of  
97 intestinal homeostasis have been demonstrated by targeted depletion of tolerogenic signals in  
98 macrophages which results in spontaneous colitis in mice (Bernshtein et al., 2019; Shouval et  
99 al., 2014; Zigmond et al., 2014). Macrophages are also part of the inflammatory cell infiltrates  
100 in mice with colitis and in patients with IBD, suggesting that macrophages might not only  
101 prevent but also drive intestinal inflammation by producing pro-inflammatory cytokines, such  
102 as IL-6, IL-1 $\beta$ , and TNF (MacDonald et al., 2011). GPR35 is also expressed in bone marrow-  
103 derived macrophages (BMDMs), and peritoneal macrophages (Lattin et al., 2008; Schneditz  
104 et al., 2019; Tsukahara et al., 2017). GPR35 interact and modulate the activity of Na/K-

105 ATPase to eventually control macrophage metabolism (Schneditz et al., 2019; Tsukahara et  
106 al., 2017). However, if GPR35 signaling in macrophages is critical to establish intestinal  
107 immune homeostasis in vivo and the putative ligand that may trigger GPR35-dependent  
108 functions in macrophages is yet to be understood.

109

110 TNF has drawn special attention in the study of IBD since TNF can drive colitis and targeting  
111 TNF with antibodies attenuates IBD in the clinic. For instance, inhibition of TNF prevents the  
112 progression of symptoms in several mouse models of disease, including spontaneous ileitis  
113 (Gunther et al., 2011), 2,4,6-trinitrobenzenesulfonic acid (TNBS) colitis (Neurath et al.,  
114 1997), and transfer colitis (Corazza et al., 1999). Anti-TNF antibodies have also been  
115 successfully implemented in the clinic for the treatment of patients with IBD (Hanauer et al.,  
116 2002; Targan et al., 1997). Besides the well-described pro-inflammatory role of TNF in  
117 colitis, some evidence suggests that TNF also has anti-inflammatory functions. For example,  
118 in the DSS colitis model, the neutralization of TNF or absence of TNF in *Tnf*-deficient mice  
119 leads to an exacerbation of colitis (Naito et al., 2003), an effect that has been attributed to  
120 TNF-mediated induction of apoptosis in T cells, which leads to resolution of inflammation  
121 (Zheng et al., 1995). TNF has also been suggested to regulate extra-adrenal corticosterone  
122 production by intestinal epithelial cells, which in turn may suppress immune responses (Noti  
123 et al., 2010).

124

125 Here we report that high *Gpr35* expression in the gastrointestinal tract is conserved across  
126 species and that GPR35 distinguishes two intestinal lamina propria CX3CR1<sup>+</sup> macrophage  
127 subpopulations that are transcriptionally distinct. Using in vitro and in vivo approaches in  
128 *gpr35* mutant zebrafish, *Gpr35*-deficient mice, and cells expressing human GPR35, we  
129 identify LPA as an endogenous ligand that triggers GPR35-dependent induction of *Tnf* and  
130 *Il1b* transcripts in macrophages. Conditional deletion of *Gpr35* in macrophages in mice

131 results increased susceptibility to DSS-induced colitis, reduced TNF production by CX3CR1<sup>+</sup>  
132 macrophages in vivo, and decreased *Cyp11b1* expression. Finally, TNF administration into  
133 mice lacking *Gpr35* in macrophages attenuated DSS-induced colitis and restored *Cyp11b1*  
134 expression. Thus, our data indicate that GPR35 controls macrophage function to maintain the  
135 intestinal cytokine milieu under steady-state conditions and during intestinal inflammation.

136

## 137 **Results**

### 138 **Colonic Macrophages Express GPR35**

139 Our interest in using zebrafish (*Danio rerio*) to investigate the function of IBD-associated risk  
140 genes led us to clone and characterize the functional zebrafish homolog of *GPR35*. We  
141 identified two *GPR35* paralogs in zebrafish that we named *gpr35a* and *gpr35b*, which share  
142 25.6% and 24% identity with the human *GPR35* protein sequence, respectively (Figure S1A).  
143 Of note, *gpr35a* and *gpr35b* were more closely related phylogenetically to human *GPR35* and  
144 murine *Gpr35* than to human or murine versions of *GPR55*, a highly similar gene (Figure  
145 S1B). Gene expression analysis revealed that *gpr35a* was expressed at similar levels in the  
146 intestine compared to the rest of the body, whereas *gpr35b* was predominantly expressed in  
147 the intestine by 120 hours post fertilization (hpf) (Figures 1A and S1C). This finding was  
148 confirmed by whole in situ hybridization (WISH), which showed expression of *gpr35b*  
149 specifically in the intestinal bulb at 120 hpf (Figure 1B). These observations were echoed in  
150 our analysis of the human protein atlas, which showed the highest *GPR35* transcript levels in  
151 the gastrointestinal tract compared to other tissues (Figure S1D). Similarly, qRT-PCR of  
152 mouse tissues revealed an increased expression pattern of *Gpr35* from the duodenum to the  
153 distal colon, in the proximal stomach, mesenteric lymph nodes (MLN), and Peyer's patches,  
154 compared to other tissues, such as the liver (Figure 1C).

155

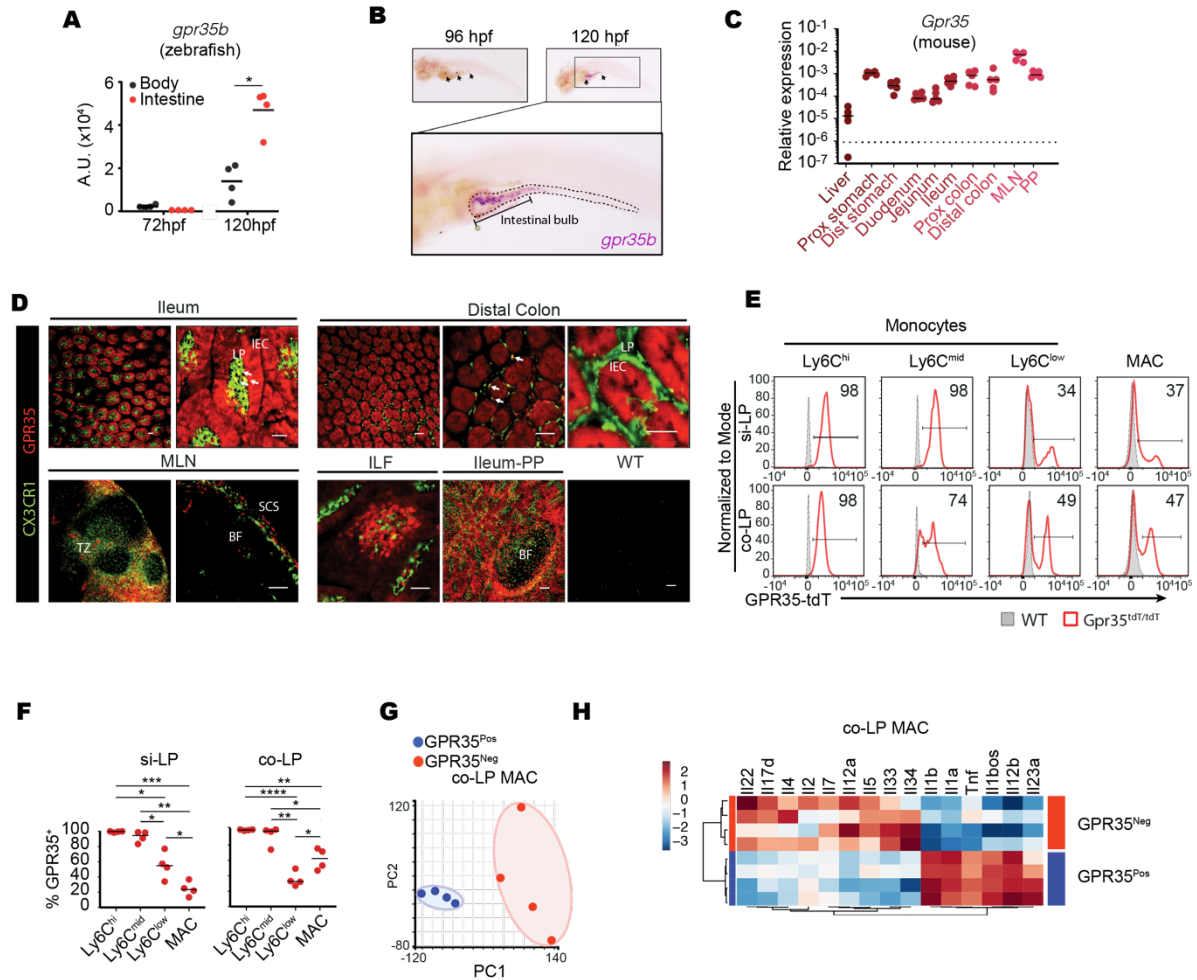

### Figure 1. GPR35 Is Expressed in Colonic Macrophages

(A) *gpr35b* mRNA expression levels by qRT-PCR normalized to *ef1a* across the body and dissected intestines of zebrafish larvae at 72 hpf and 120 hpf. A.U.; arbitrary units normalized to the lower value (body, 72 hpf). (B) Whole mount in situ hybridization (WISH) to detect *gpr35b* mRNA expression in zebrafish larvae at 96 hpf and 120 hpf. Arrows indicate the intestinal bulb; dashed lines indicate the intestinal tract. One representative picture is shown from 40 larvae. (C) *Gpr35* mRNA expression levels by qRT-PCR normalized to *Gapdh* across indicated tissues in WT mice. (D) Ex vivo fluorescence imaging of ileum, distal colon, mesenteric lymph node (MLN), isolated lymph follicle (ILF), and Peyer's patch (PP) from *Cx3cr1*-GFP (green) x *Gpr35*-tdTomato (red) double reporter mice. The last panel shows colon from WT as the background control. LP, lamina propria; IEC, intestinal epithelial cell; TZ, T cell zone; BF, B cell follicle; SCS, Subcapsular sinus. Arrows indicate CX3CR1<sup>+</sup> phagocytes that express GPR35. Scale bars, 50  $\mu$ m. (E) Representative *Gpr35*-tdTomato expression by flow cytometry in monocyte subsets (Ly6C<sup>high</sup> to Ly6C<sup>low</sup>) and macrophages (MAC) from small intestinal and colonic lamina propria (si-LP and co-LP) of *Gpr35*-tdTomato reporter mice (red unfilled histograms) and WT mice (gray histograms) as the background control. Numbers in histograms indicate the percentage of GPR35-tdTomato<sup>+</sup> cells. (F) Quantification of data from (E) showing the percentage of GPR35<sup>+</sup> cells in monocytes and macrophages in the si-LP and co-LP. (G) Principal component analysis from RNA sequencing of GPR35-tdTomato-positive (GPR35<sup>pos</sup>) and -negative (GPR35<sup>neg</sup>) colon lamina propria (co-LP) macrophages. (H) Heatmap representation of cytokine expression profiles from RNA sequencing of GPR35-tdTomato-positive (pos) and -negative (neg) subpopulations in co-LP macrophages. Data are represented as individual values with medians with each dot representing one biological replicate. \* $p \leq 0.05$ , \*\* $p \leq 0.01$ , \*\*\* $p \leq 0.001$ , \*\*\*\* $p \leq 0.0001$  by two-way ANOVA with Tukey's multiple comparisons test.

156 To more precisely define the population of cells expressing GPR35, we generated a *Gpr35*-  
 157 tdTomato reporter mouse line (Figure S2A). Immunofluorescent staining for GPR35 showed  
 158 colocalization with td-Tomato, indicating that the reporter accurately monitored endogenous  
 159 *Gpr35* expression (Figure S2B). Ex vivo imaging of small and large intestinal tissues from



160 *Gpr35*-tdTomato mice crossed to *Cx3cr1*-GFP reporter mice revealed GPR35 expression in  
161 intestinal epithelial cells and lamina propria CX3CR1<sup>+</sup> phagocytes (Figure 1D). In addition,  
162 GPR35<sup>+</sup> cells were located in subcapsular sinus and T cell zones of MLN, in isolated lymph  
163 follicles and the subepithelial dome regions of Peyer's patches, but not in B cell follicles of  
164 MLN neither/nor in Peyer's patches (Figure 1D). We also observed GPR35 expression in  
165 CD64<sup>+</sup>CD11c<sup>+</sup> dendritic cells, whereas no expression was detected in B cells, CD4<sup>+</sup> or CD8<sup>+</sup> T  
166 cells, neutrophils, NK cells, or innate lymphoid cells, including ILC1, ILC2, and ILC3 cells  
167 (Figure S2C).

168

169 To further track the expression of GPR35 in macrophages and their precursors, we analyzed  
170 the expression of GPR35 by macrophages and monocytes with flow cytometry. CX3CR1<sup>+</sup>  
171 macrophages derive from blood Ly6C<sup>high</sup> monocytes that extravasate into the lamina propria,  
172 downregulate Ly6c and develop into mature macrophages through intermediates in a  
173 "monocyte waterfall" development (Bain et al., 2013). When we examined the expression  
174 of GPR35 alongside the differentiation of monocytes into macrophages (Steinert et al., 2017)  
175 (Figure S2D), most Ly6C<sup>high</sup> monocytes in the lamina propria of the small and large intestine  
176 expressed GPR35 (Figure 1E). Percentages of GPR35<sup>+</sup> cells gradually decreased to  
177 approximately 30% and 50% alongside the differentiation of monocytes into mature  
178 macrophages in the small and large intestine, respectively (Figure 1F) suggesting that  
179 monocytes down-regulate GPR35 during their maturation into colonic macrophages.

180

181 To gain insight into the potential function of GPR35<sup>+</sup> macrophages, we performed bulk RNA-  
182 seq analysis on sorted GPR35<sup>-</sup> and GPR35<sup>+</sup> macrophages from the colonic lamina propria.  
183 Unsupervised hierarchical clustering and principal component analysis (PCA) revealed that  
184 GPR35<sup>-</sup> and GPR35<sup>+</sup> macrophages are transcriptionally distinct populations (Figures 1G and  
185 S2E), with GPR35<sup>+</sup> macrophages showing higher *Il1b*, *Il1a*, *Tnf*, *Il12b*, and *Il23a* transcript

186 levels compared to GPR35<sup>-</sup> macrophages (Figure 1H). Taken together, these data show that  
187 GPR35 is highly expressed in intestinal tissues across species, and GPR35<sup>+</sup> murine colonic  
188 macrophages are characterized by higher expression of pro-inflammatory genes compared to  
189 GPR35<sup>-</sup> macrophages.

190

### 191 ***Gpr35* Expression Is Microbiota-Dependent and Upregulated Upon Inflammation**

192 Next, we considered the possibility that the intestinal environment could modulate the  
193 expression of GPR35. To address this question, we first investigated whether induction of  
194 *gpr35* mRNA expression in the zebrafish intestine was microbiota-dependent. We found that  
195 perturbation of intestinal bacteria by treatment with antibiotics resulted in reduced intestinal  
196 *gpr35b* transcript levels, as seen by WISH and qPCR, when compared to vehicle-treated  
197 zebrafish (Figures 2A and 2B). Analogous results were obtained in mice, in which  
198 administration of a broad-spectrum antibiotic cocktail (vancomycin, neomycin,  
199 metronidazole, gentamicin, and ampicillin) resulted in decreased levels of *Gpr35* transcript in  
200 the colonic lamina propria compared to non-treated mice (Figure 2C). Similarly, colonic  
201 tissue from germ-free mice had lower *Gpr35* expression levels compared to specific  
202 pathogen-free mice (Figure 2D). Altogether, these results suggest that the microbiota  
203 modulates intestinal *Gpr35* expression in zebrafish and mice.

204

205 Given that the intestinal epithelium and immune system are in constant exposure to  
206 inflammatory stimuli from the luminal content and Gpr35 is highly expressed in the intestine,  
207 we next hypothesized that *Gpr35* expression might be modulated by inflammation.

208 Supporting this hypothesis, we found that triggering intestinal inflammation by treating  
209 zebrafish with TNBS resulted in increased *gpr35b* transcript levels in the intestinal bulb  
210 (Figure 2E, black arrowheads) and ectopic expression in the posterior intestine (Figure 2E,  
211 grey arrowheads) as observed by WISH. Furthermore, qPCR revealed higher levels of *gpr35b*

212 transcripts in the intestine of TNBS-treated zebrafish compared to vehicle-treated animals

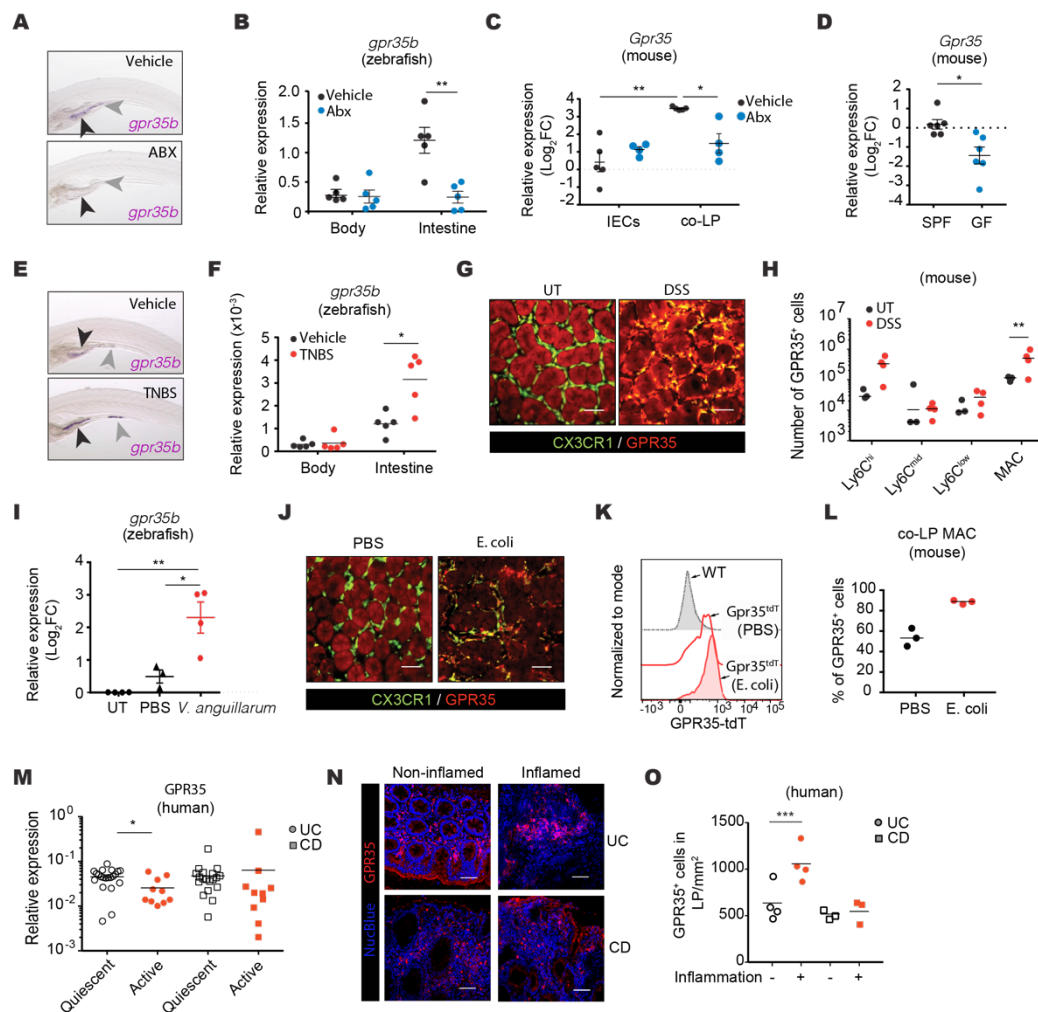

**Figure 2. *Gpr35* Expression is Modulated by the Microbiota and Inflammation**

(A) *gpr35b* mRNA expression detected by WISH using a *gpr35b* anti-sense probe in 120 hpf zebrafish larvae treated with antibiotics (ABX) or vehicle. Larvae were treated for 48 h starting at 72 hpf; antibiotics were diluted in E3 water. Arrowheads indicate the intestinal bulb. One representative picture is shown from 40 larvae. (B) *gpr35b* mRNA expression levels by qRT-PCR normalized to *ef1a* across the body and dissected intestines from WT zebrafish treated with antibiotics or vehicle as described in (A). Each dot represents a pool of 10 larvae. (C) *Gpr35* mRNA expression levels by qRT-PCR normalized to *Hprt* in intestinal epithelial cells (IECs) and colonic lamina propria cells (co-LP) from WT mice treated with an antibiotics cocktail or vehicle. Antibiotics were administered every 24 h for 10 days by oral gavage. (D) *Gpr35* mRNA expression levels by qRT-PCR normalized to *Hprt* in colonic tissue from specific pathogen-free (SPF) and germ-free (GF) mice. (E) *gpr35b* mRNA expression detected by WISH in 120 hpf zebrafish larvae treated with TNBS or vehicle. Larvae were treated for 48 h starting at 72 hpf; TNBS was diluted in E3 water. Arrowheads indicate intestinal bulb and the posterior intestine. One representative picture is shown from 20 larvae. (F) *gpr35b* mRNA expression levels by qRT-PCR normalized to *ef1a* across the body and dissected intestines from WT zebrafish treated with TNBS or vehicle as described in (E). Each dot represents a pool of 10 larvae. (G) Ex vivo fluorescence imaging of colon from untreated (UT) or DSS-treated *Cx3cr1*-GFP (green) x *Gpr35*-tdTomato (red) double reporter mice on day 7 of DSS colitis. Scale bars, 50  $\mu$ m. (H) Numbers of GPR35<sup>+</sup> monocytes (Ly6C<sup>high</sup> to Ly6C<sup>low</sup>) and macrophages (MAC) quantified by flow cytometry of co-LP from UT and DSS-treated *Gpr35*-tdTomato mice. (I) *gpr35b* mRNA expression levels measured by qRT-PCR normalized to *ef1a* in WT zebrafish exposed to PBS or *V. anguillarum*. Injections of *V. anguillarum* extracts were performed in the swim bladder/intestine of 112 hpf anesthetized larvae; tissues were harvested 6 h post injection to isolate total mRNA. Each dot represents a pool of 10 larvae. (J) Ex vivo fluorescence imaging of colon from *Cx3cr1*-GFP (green) x *Gpr35*-tdTomato (red) mice gavaged with PBS or *E. coli* every other day; tissue collected on day 21. Scale bar, 50  $\mu$ m. (K) Representative *Gpr35*-tdTomato expression by flow cytometry in co-LP macrophages from WT (gray histogram), PBS-gavaged *Cx3cr1*-GFP x *Gpr35*-tdTomato (red unfilled histogram), and *E. coli*-gavaged *Cx3cr1*-GFP x *Gpr35*-tdTomato (red filled histogram) mice. (L) Quantification of flow cytometry data from (K) for numbers of GPR35<sup>+</sup> cells in co-LP macrophages in PBS-gavaged or *E. coli*-gavaged *Cx3cr1*-GFP x *Gpr35*-tdTomato mice. (M) *GPR35* mRNA expression by qRT-PCR comparing biopsies from ulcerative colitis (UC) or Crohn's disease (CD) patients with quiescent or active disease. (N) Immunofluorescence imaging of UC or CD patient biopsies taken from non-inflamed (left) or inflamed regions (right). Sections were stained for GPR35 (red) and NucBlue (blue) for nuclear staining. Scale bars, 50  $\mu$ m. (O) Number of GPR35<sup>+</sup> cells in the lamina propria per mm<sup>2</sup> quantified by manual counting of immunofluorescence images as shown in (N) of non-inflamed and inflamed UC or CD biopsies. Data are represented as individual values with medians with each dot representing one biological replicate. \* $p \leq 0.05$ , \*\* $p \leq 0.01$ , \*\*\* $p \leq 0.001$ , \*\*\*\* $p \leq 0.0001$  by unpaired t-test (D), one-way (I) or two-way ANOVA with Tukey's multiple comparisons test (B, C, F, H, O) or Mann-Whitney (L, M).

213 (Figure 2F). Similarly, ex vivo imaging of *Cx3cr1*-GFP x *Gpr35*-tdTomato double reporter  
214 mice revealed increased *Gpr35*-tdTomato signal by CX3CR1<sup>+</sup> mononuclear phagocytes in the  
215 colon of mice treated with DSS (Figure 2G), and flow cytometric analysis confirmed  
216 increased number of GPR35<sup>+</sup> colonic macrophages in response to DSS (Figure 2H). To  
217 determine whether infection-induced colitis would affect *Gpr35* expression similarly to  
218 chemically (i.e., DSS) induced colitis, we next injected swim bladders from zebrafish with  
219 *Vibrio anguillarum* extracts. As we predicted, zebrafish injected with *V. anguillarum* showed  
220 a ~4-fold increase in *gpr35b* transcripts compared to PBS-treated fish (Figure 2I). In mice, we  
221 found that colonization of *Cx3cr1*-GFP x *Gpr35*-tdTomato double reporter mice with  
222 *Escherichia coli* DH10B pCFP-OVA (Rossini et al., 2014) induced GPR35 expression in  
223 colonic lamina propria macrophages (Figures 2J-2L), providing further evidence that GPR35  
224 expression is modulated in the context of inflammation.

225  
226 To pursue these results, we next sought to test the clinical relevance of GPR35 upregulation  
227 during human colitis. For these studies, we determined the expression of *GPR35* in biopsies  
228 provided by the Swiss IBD Cohort Study Group obtained from patients with active or  
229 quiescent Crohn's disease or ulcerative colitis. We found decreased *GPR35* expression in  
230 patients with ulcerative colitis with active disease compared to those with quiescent disease;  
231 in contrast, patients with Crohn's disease showed comparable *GPR35* expression between  
232 active and quiescent disease in entire tissues (Figure 2M). Since both intestinal epithelial cells  
233 and macrophages express GPR35, we next performed staining for GPR35 in patient biopsies  
234 to exclude the possibility that *GPR35* expression might be differentially regulated in distinct  
235 compartments. In these comparisons, we determined the number of GPR35<sup>+</sup> cells in the  
236 lamina propria of biopsies taken from inflamed or non-inflamed regions of the intestine from  
237 the same patients. We found no differences in the numbers of GPR35<sup>+</sup> cells between inflamed  
238 and non-inflamed regions in patients with Crohn's disease, but we did observe an increase in

239 the numbers of GPR35<sup>+</sup> cells in inflamed regions compared to non-inflamed segments of the  
240 same patient with ulcerative colitis (Figures 2N and 2O). Taken together, these data indicated  
241 that lamina propria cells of patients with ulcerative colitis with active disease increase GPR35  
242 expression.

243

#### 244 **LPA Induces *Tnf* Expression in Macrophages in a GPR35-Dependent Manner**

245 To identify endogenous ligands of GPR35 in the context of intestinal immunity, we began by  
246 focusing on LPA, KYNA, and CXL17, which have been previously suggested as GPR35  
247 ligands (Maravillas-Montero et al., 2015; Oka et al., 2010; Wang et al., 2006). We first  
248 screened the activating potential of these candidate ligands using a Chinese hamster ovary  
249 (CHO)-K1 GPR35 Gi cell line in which human GPR35 is stably overexpressed and naturally  
250 coupled to an inhibitory G protein that inhibits forskolin-induced cAMP accumulation in  
251 response to GPR35 agonists. As expected, stimulation with the synthetic GPR35 agonist  
252 zaprinast inhibited forskolin-induced cAMP production (Figure 3A). KYNA did not elicit a  
253 significant response, whereas LPA and CXCL17 inhibited cAMP production, with LPA  
254 exerting its effect at a lower concentration compared to CXCL17 (Figure 3A). We next took  
255 advantage of CRISPR/Cas9-based genome engineering of zebrafish (Li et al., 2016) to  
256 generate a *gpr35b* mutant line, named *gpr35b<sup>uu1892</sup>* (Figures S3A and S3B). Forty-eight hours  
257 of LPA treatment resulted in elevated expression of pro-inflammatory cytokines, including  
258 *tnf*, *il1b*, and *il17a/f* in WT fish; however, none of these cytokines were induced by LPA in  
259 the *gpr35b<sup>uu19b2</sup>* mutants (Figure 3B), indicating that the LPA-induced expression of cytokines  
260 is *gpr35b*-dependent. To validate these findings in mice, we used CRISPR/Cas9 to generate a  
261 *Gpr35* knockout (KO) mouse line (Figure S4A) that failed to show GPR35 staining by  
262 immunofluorescence (Figure S4B). In line with the zebrafish data, stimulation of WT murine  
263 BMDMs with LPA significantly induced *Tnf*, *Il1b*, and *Il23a* expression, whereas LPA  
264 stimulation in *Gpr35<sup>-/-</sup>* BMDMs did not significantly induce the expression of these cytokines

265 compared to unstimulated *Gpr35*<sup>-/-</sup> BMDMs (Figure 3C). In addition, we observed a  
 266 significant difference in *Tnf* transcript levels between WT and *Gpr35*<sup>-/-</sup> BMDMs stimulated  
 267 with LPA (Figure 3C), suggesting that LPA-mediated *Tnf* induction is dependent on GPR35  
 268 expression.  
 269

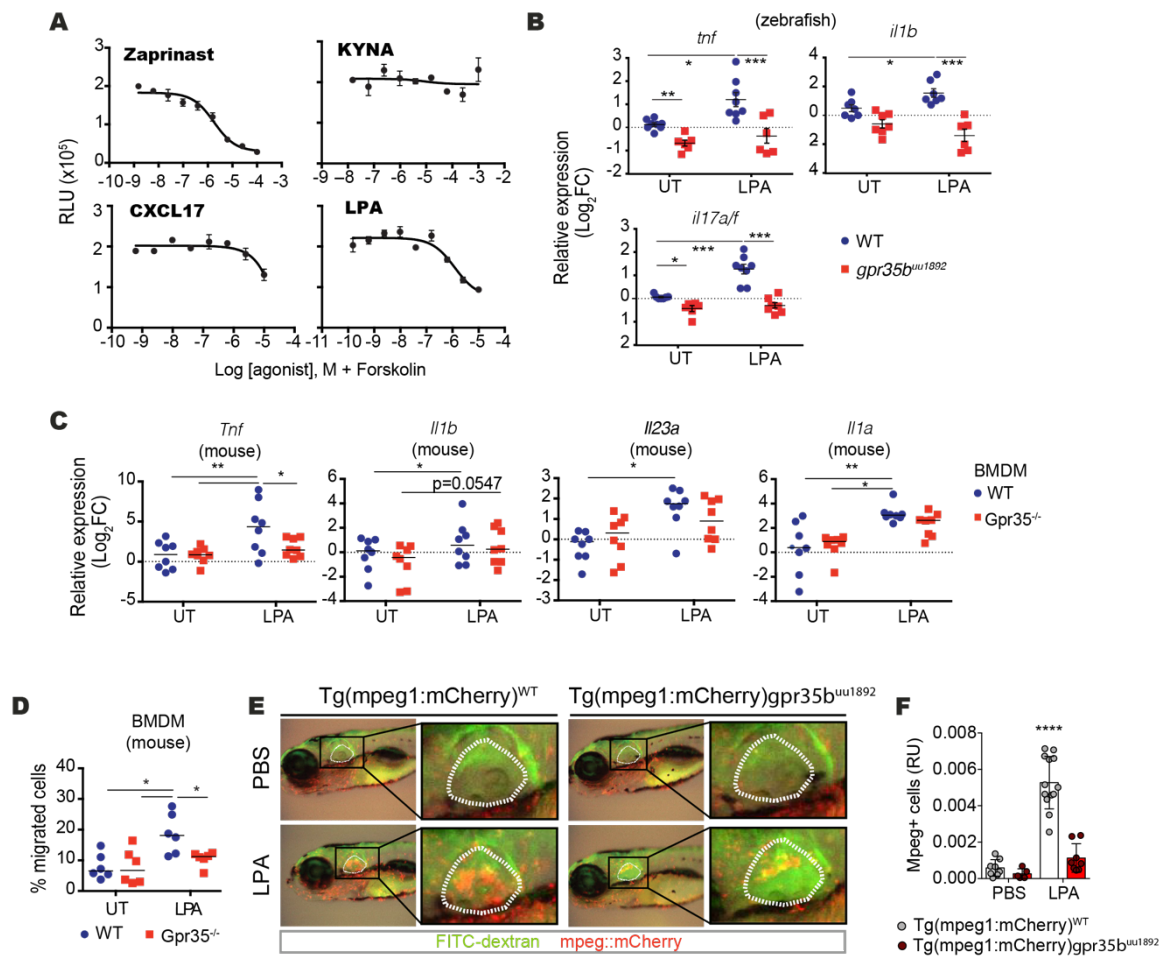

**Figure 3. LPA Induces *Tnf* Expression in a GPR35-Dependent Manner**

(A) Relative luminescence unit (RLU) values for intracellular cAMP levels in Gi-coupled GPR35-transfected CHO-K1 cells in response to adenylyl cyclase activating-forskolin against serial dilutions of zaprinast, KYNA, CXCL17, or LPA. Data are represented as median  $\pm$  range from doublets with nonlinear fit curves. (B) mRNA expression levels of *tnf*, *il1b*, and *il17a/lf* measured by qRT-PCR in untreated (UT) or LPA-treated WT or *gpr35*<sup>uu1892</sup> zebrafish larvae. Larvae were treated for 48 h starting at 72 hpf. Analysis was performed at 120 hpf and each dot represents a pool of 10 larvae. (C) mRNA expression levels of *Tnf*, *Il1b*, *Il23a*, and *Il1a* measured by qRT-PCR in UT or LPA-treated bone marrow-derived macrophages (BMDMs) derived from WT or *Gpr35*<sup>-/-</sup> mice. Results are cumulative of three independent experiments in which each dot represents one mouse. (D) Percentages of migrated BMDMs from WT or *Gpr35*<sup>-/-</sup> mice towards UT control or LPA in transwell assay acquired by flow cytometry. Results are cumulative of three independent experiments in which each dot represents one mouse. (E) Macrophage recruitment (*mpeg1*<sup>+</sup> cells) in *Tg(mpeg1:mCherry)*<sup>WT</sup> and *Tg(mpeg1:mCherry)gpr35*<sup>uu1892</sup> zebrafish larvae injected with DMSO or LPA (10  $\mu$ M) in the otic vesicle (white dashed line). Results are cumulative of two independent experiments in which every dot represents one embryo. (F) Quantification of macrophage recruitment data as shown in (E) for numbers of *mpeg1*<sup>+</sup> cells in otic vesicles of *Tg(mpeg1:mCherry)*-WT and *Tg(mpeg1:mCherry)gpr35*<sup>uu1892</sup> zebrafish larvae injected with PBS or LPA. Data are represented as individual values with medians. \* $p \leq 0.05$ , \*\* $p \leq 0.01$ , \*\*\* $p \leq 0.001$ , \*\*\*\* $p \leq 0.0001$  by two-way ANOVA with Tukey's multiple comparisons test.

270 Given that LPA has been previously shown to cause increased migration of monocytes,  
271 microglia, and ovarian cancer cells (Oh et al., 2017; Plastira et al., 2017; Takeda et al., 2019),  
272 we next tested whether LPA acts as a chemoattractant for macrophages by quantifying the  
273 migration of WT and *Gpr35* KO BMDMs in response to LPA in vitro. These experiments  
274 revealed that *Gpr35*-deficient BMDMs had reduced migration in response to LPA as  
275 compared to WT BMDMs (Figure 3D). To investigate the LPA-GPR35 axis in modulating  
276 macrophage chemotaxis in vivo, we next crossed *gpr35<sup>uu1892</sup>* mutant zebrafish with the  
277 reporter strain *Tg(mpeg1:mCherry)* to visualize macrophage dynamics as previously  
278 described (Nguyen-Chi et al., 2015). Injection of LPA within the otic vesicle resulted in  
279 increased macrophage infiltration compared to PBS injection in WT reporter fish. By contrast,  
280 macrophages in *gpr35<sup>uu1892</sup>* mutant fish did not respond to LPA injection (Figures 3E and  
281 3F), indicating that LPA induces chemotaxis of macrophages in vivo in a Gpr35-dependent  
282 fashion.

283

#### 284 **Intestinal Inflammation Increases Autotaxin Expression in Zebrafish and Mice**

285 LPA is a phospholipid derivate found in cell membranes and cell walls that can act as an  
286 extracellular signaling molecule (Ye and Chun, 2010). LPA is mainly synthesized by  
287 autotaxin (ATX), which removes a choline group from lysophosphatidylcholine (Gesta et al.,  
288 2002). We therefore investigated whether ATX is induced during intestinal inflammation in  
289 vivo using a TNBS model of colitis in zebrafish, which revealed a two-fold increase in *atx*  
290 transcripts in intestinal tissues isolated from TNBS-treated zebrafish larvae compared to  
291 untreated larvae (Figure 4A). Pursuing these findings in mice, we first consulted our  
292 published longitudinal transcriptomic data from mice undergoing DSS colitis (Czarnewski et  
293 al., 2019), which showed transient colonic *Atx* expression peaking at d10 (Figure 4B).  
294 Consistent with these observations, mice with DSS-induced intestinal inflammation showed  
295 an increased number of ATX<sup>+</sup> cells in colonic tissues as inflammation progressed (Figures 4C

296 and 4D). Notably, *Gpr35*<sup>-/-</sup> mice exposed to DSS showed a comparable increase in the number  
 297 of ATX<sup>+</sup> cells compared to WT mice exposed to DSS (Figure 4E), suggesting that GPR35  
 298 does not modulate ATX expression. In conclusion, colitis in zebrafish and mice led to  
 299 increased *Atx* expression in the colon.

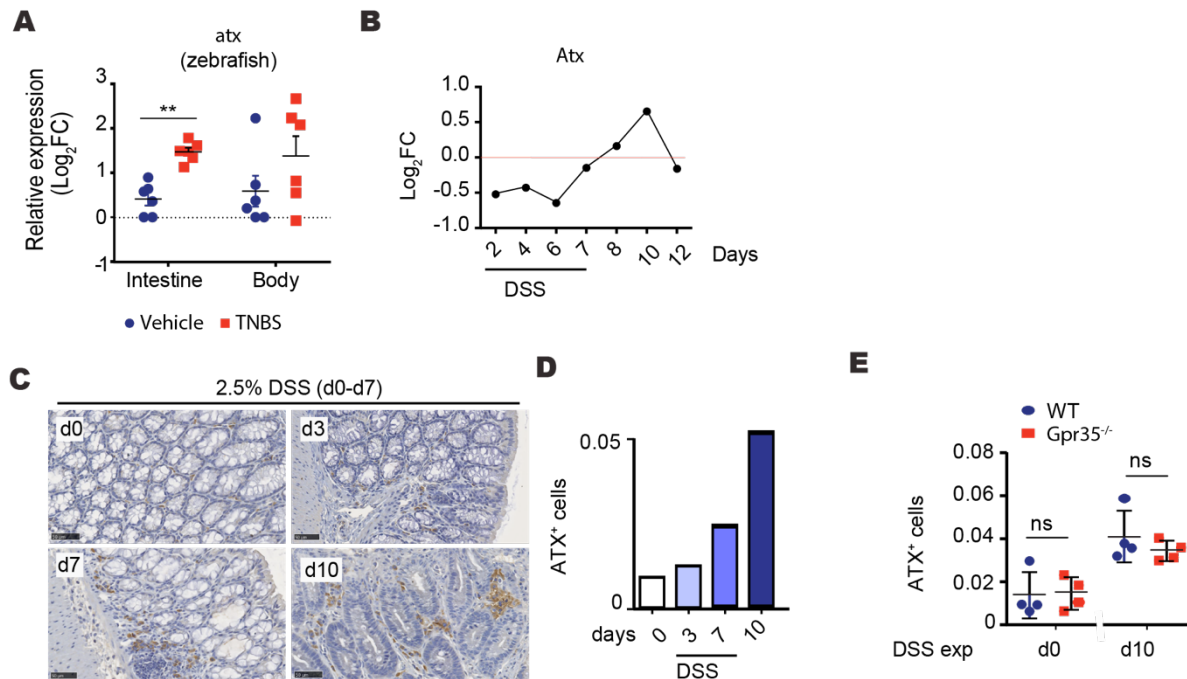

**Figure 4. Colitis Induces Expression of the LPA-Generating Enzyme Autotaxin**

(A) *Autotaxin* (*atx*) mRNA expression levels measured by qRT-PCR normalized to *ef1a* across the body and dissected intestine of WT zebrafish treated with TNBS or vehicle. Larvae were treated for 48 h starting at 72 hpf. Analysis was performed at 120 hpf and each dot represents a pool of 10 larvae. (B) RNA-seq analysis showing *Atx* gene expression from colonic tissue during 2.5% DSS-induced colitis (7 days exposure) and recovery. Dots show the average from three different mice per data point. (C) Immunohistochemistry imaging of WT mice treated with 2.5% DSS at indicated timepoints. Sections were stained for autotaxin (brown) and H&E (blue). One representative experiment is shown from two experiments. Scale bars, 50  $\mu$ m. (D) Quantification of autotaxin<sup>+</sup> cell data as shown in (C) from colonic tissue of DSS-treated mice at indicated time points. One representative experiment is shown from two experiments. (E) Quantification of autotaxin<sup>+</sup> cells from colonic tissue at day 0 and day 10 of WT and *Gpr35*<sup>-/-</sup> mice treated with DSS. Data are represented as individual values with mean  $\pm$  SD. \* $p \leq 0.05$ , \*\* $p \leq 0.01$ , \*\*\* $p \leq 0.001$  by two-way ANOVA with Tukey's multiple comparisons test.

300

### 301 Macrophage-Specific Deletion of *Gpr35* Exacerbates DSS Colitis

302 Given that GPR35 activation modulate cytokine production and macrophage migration

303 together with the potential LPA synthesis during DSS-induced colitis, we hypothesize that

304 GPR35 might affect intestinal inflammation. We next exposed WT and *Gpr35*<sup>-/-</sup> mice to DSS

305 and evaluate the degree of intestinal inflammation. *Gpr35*-deficient mice had exacerbated

306 colitis compared to WT animals as indicated by elevated body weight loss, increased disease



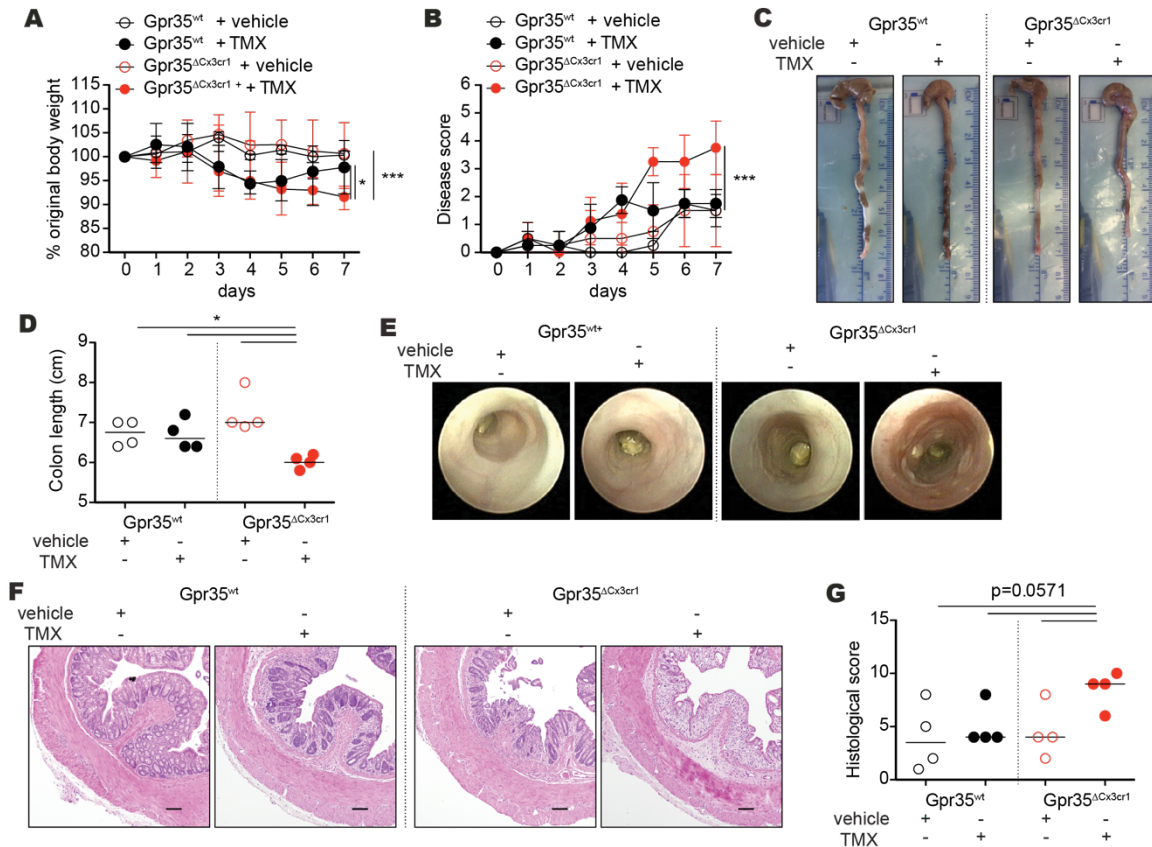

**Figure 5. Deletion of *Gpr35* in CX3CR1<sup>+</sup> Macrophages Exacerbates DSS-Induced Colitis**

(A) Body weight changes (normalized to initial weight) during DSS colitis for 7 days from vehicle-injected (corn oil) or tamoxifen (TMX)-injected *Gpr35*<sup>wt</sup> or *Gpr35*<sup>ΔCx3cr1</sup> mice. Data are shown as mean ± SD for four mice per group. (B) Disease activity scores from daily monitoring of vehicle or TMX-injected *Gpr35*<sup>wt</sup> or *Gpr35*<sup>ΔCx3cr1</sup> mice with DSS colitis. Data are shown as mean ± SD for four mice per group. (C) Representative images of colons from vehicle or TMX-injected *Gpr35*<sup>wt</sup> or *Gpr35*<sup>ΔCx3cr1</sup> mice on day 7 of DSS colitis. (D) Colon lengths on day 7 of DSS colitis from DSS-treated *Gpr35*<sup>wt</sup> or *Gpr35*<sup>ΔCx3cr1</sup> mice treated with daily injections of vehicle or TMX. (E) Endoscopic images and (F) Representative H&E microscopy images of colons from vehicle or TMX-treated *Gpr35*<sup>wt</sup> or *Gpr35*<sup>ΔCx3cr1</sup> mice with DSS colitis. Scale bar, 100 μm. (G) Histology scores of indicated groups quantified from H&E staining of colon sections as shown in F. Each dot represents one animal with medians unless stated otherwise. \*p ≤ 0.05, \*\*p ≤ 0.01, \*\*\*p ≤ 0.001, \*\*\*\*p ≤ 0.0001 by two-way ANOVA with Tukey's multiple comparisons test (A, B) or Mann-Whitney (D, G).

307 activity scores, shorter colons, worsened histological signs of colitis, and more severe  
 308 histology scores (Figures S5A-S5F). We next sought to define the cell type(s) underlying the  
 309 worsened colitis in *Gpr35*-deficient mice. Since GPR35 is expressed by both intestinal  
 310 epithelial cells and CX3CR1<sup>+</sup> macrophages, we generated *Gpr35*<sup>lox</sup> mice by adding loxP sites  
 311 before exon 2 and after 3' UTR regions of *Gpr35* (Figure S6A) and crossed *Gpr35*<sup>lox</sup> with  
 312 *Cx3cr1*<sup>CreER</sup> mice to obtain tamoxifen-inducible *Gpr35*<sup>ΔCx3cr1</sup> mice. This cross yielded mice  
 313 with tamoxifen-inducible deletion of *Gpr35* specifically in CX3CR1<sup>+</sup> macrophages, a deletion  
 314 we confirmed by immunofluorescent staining for GPR35 (Figures S6B and S6C). *Gpr35*<sup>ΔCx3cr1</sup>  
 315 mice displayed aggravated colitis compared to other control groups, as demonstrated by

316 significant body weight loss, increased disease activity scores, significantly reduced colon  
 317 length, and increased endoscopic and histological colitis scores (Figures 5A-5G). Consistent  
 318 with enhanced inflammation, flow cytometric analysis revealed increased percentages and  
 319 numbers of neutrophils in *Gpr35<sup>ΔCx3cr1</sup>* compared to control mice, further indicating  
 320 exacerbated inflammation in the colon of *Gpr35<sup>ΔCx3cr1</sup>* mice compared to WT mice (Figures  
 321 S7A-S7C). Aggravated colitis did not accompany higher frequencies or increased numbers of  
 322 macrophages in the colonic lamina propria of *Gpr35<sup>ΔCx3cr1</sup>* mice (Figures S7A-S7C).  
 323 *Gpr35<sup>ΔCx3cr1</sup>* mice did show reduced frequencies and mean fluorescence intensity of TNF-  
 324 producing macrophages (Figures 6A and 6B), although we did not observe significant  
 325 changes in overall expression of *Il10*, *Il1b*, *Il6*, or *Tnf* in colonic tissue (Figure S7D). These

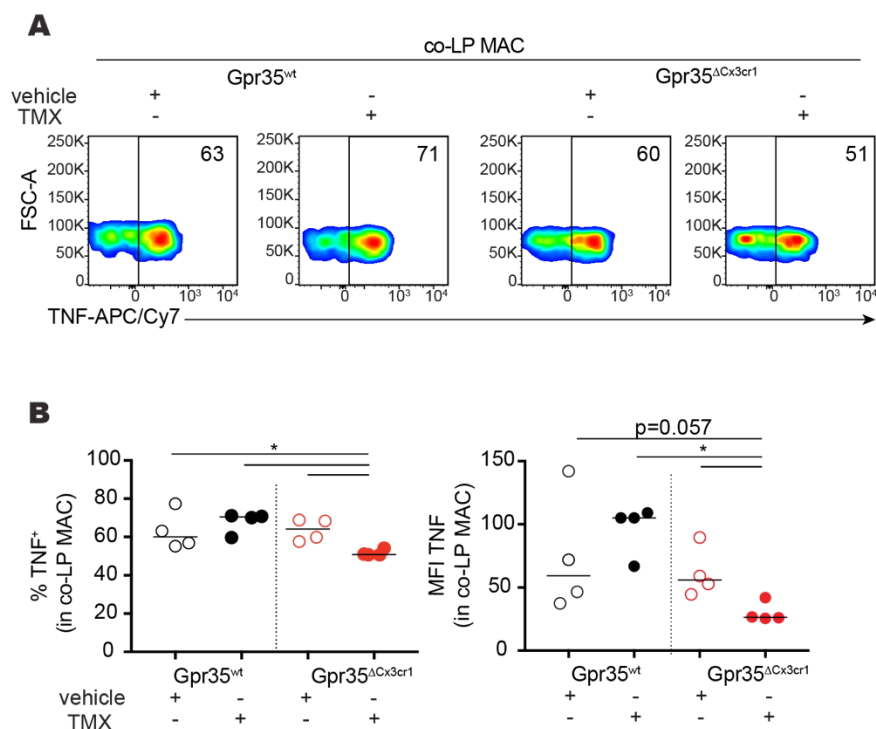

**Figure 6. Deletion of *Gpr35* in CX3CR1<sup>+</sup> Macrophages Is Associated with Reduced TNF Production**

(A) After gating on viable CD45<sup>+</sup>MHC class II<sup>+</sup> CD64<sup>+</sup> cells from vehicle or TMX-treated *Gpr35<sup>wt</sup>* or *Gpr35<sup>ΔCx3cr1</sup>* mice TNF-producing colonic lamina propria macrophages (co-LP MAC) were analyzed by flow cytometry on day 7 of DSS colitis. Numbers in density plots indicate the percentage of TNF<sup>+</sup> cells. (B) Percentages and mean fluorescence intensity (MFI) of TNF<sup>+</sup> cells in macrophages from vehicle or TMX-treated *Gpr35<sup>wt</sup>* or *Gpr35<sup>ΔCx3cr1</sup>* mice based on flow cytometry data on day 7 of DSS colitis as shown in (A). Data are presented as individual values with medians; each dot represents one animal. \*p ≤ 0.05, Mann-Whitney U test.

326 results indicate that deletion of *Gpr35* in macrophages exacerbates DSS-induced colitis and is  
327 associated with reduced macrophage-derived TNF.

328

### 329 **TNF Attenuates Exacerbated DSS Colitis in *Gpr35*<sup>ΔCx3cr1</sup> Mice**

330 Despite the well-known pro-inflammatory properties of TNF and its pathogenic role in human  
331 IBD, some studies have suggested anti-inflammatory properties for TNF in the context of  
332 DSS-induced colitis, where TNF neutralization or *Tnf* deficiency exacerbates symptoms  
333 (Naito et al., 2003; Noti et al., 2010). We therefore investigated whether exacerbated colitis in  
334 *Gpr35*<sup>ΔCx3cr1</sup> mice was due to the inability of CX3CR1<sup>+</sup> macrophages to produce TNF. To  
335 address this hypothesis, we injected *Gpr35*<sup>ΔCx3cr1</sup> mice daily with 1 μg TNF. Remarkably, we  
336 found that this treatment resulted in reduced colitis severity compared to untreated  
337 *Gpr35*<sup>ΔCx3cr1</sup> mice, as indicated by significantly decreased body weight loss, reduced disease  
338 activity scores, significantly longer colon length, reduced endoscopic signs of colitis, and  
339 reduced histologic colitis scores (Figures 7A-7F). Given that TNF can induce the expression  
340 of *Cyp11a1* and *Cyp11b1*, which encode steroidogenic enzymes involved in the synthesis of  
341 corticosterone in intestinal epithelial cells and thereby can attenuate the severity of DSS-  
342 induced colitis (Noti et al., 2010), we measured *Cyp11a1* and *Cyp11b1* expression in the  
343 colon in these mice. Expression of *Cyp11b1* but not *Cyp11a1* was reduced in *Gpr35*<sup>ΔCx3cr1</sup>  
344 mice (Figures 7G and 7H), and injection of TNF in *Gpr35*<sup>ΔCx3cr1</sup> mice restored *Cyp11b1*  
345 expression during colitis (Figure 7H). Consistent with these findings, supernatants of colonic  
346 explants from *Gpr35*<sup>ΔCx3cr1</sup> mice had lower corticosterone concentrations compared to WT  
347 animals with colitis, whereas TNF injection resulted in significantly increased corticosterone  
348 concentrations in supernatants of colonic explants compared to explants from untreated  
349 *Gpr35*<sup>ΔCx3cr1</sup> mice with colitis (Figure 7I). Taken together, these results demonstrate that loss  
350 of *Gpr35* in macrophages leads to aggravated colitis that is associated with reduced *Cyp11b1*

351 expression in the intestine; notably, both the worsened colitis and decreased *Cyp11b1*  
 352 expression were reversed by injection of TNF.

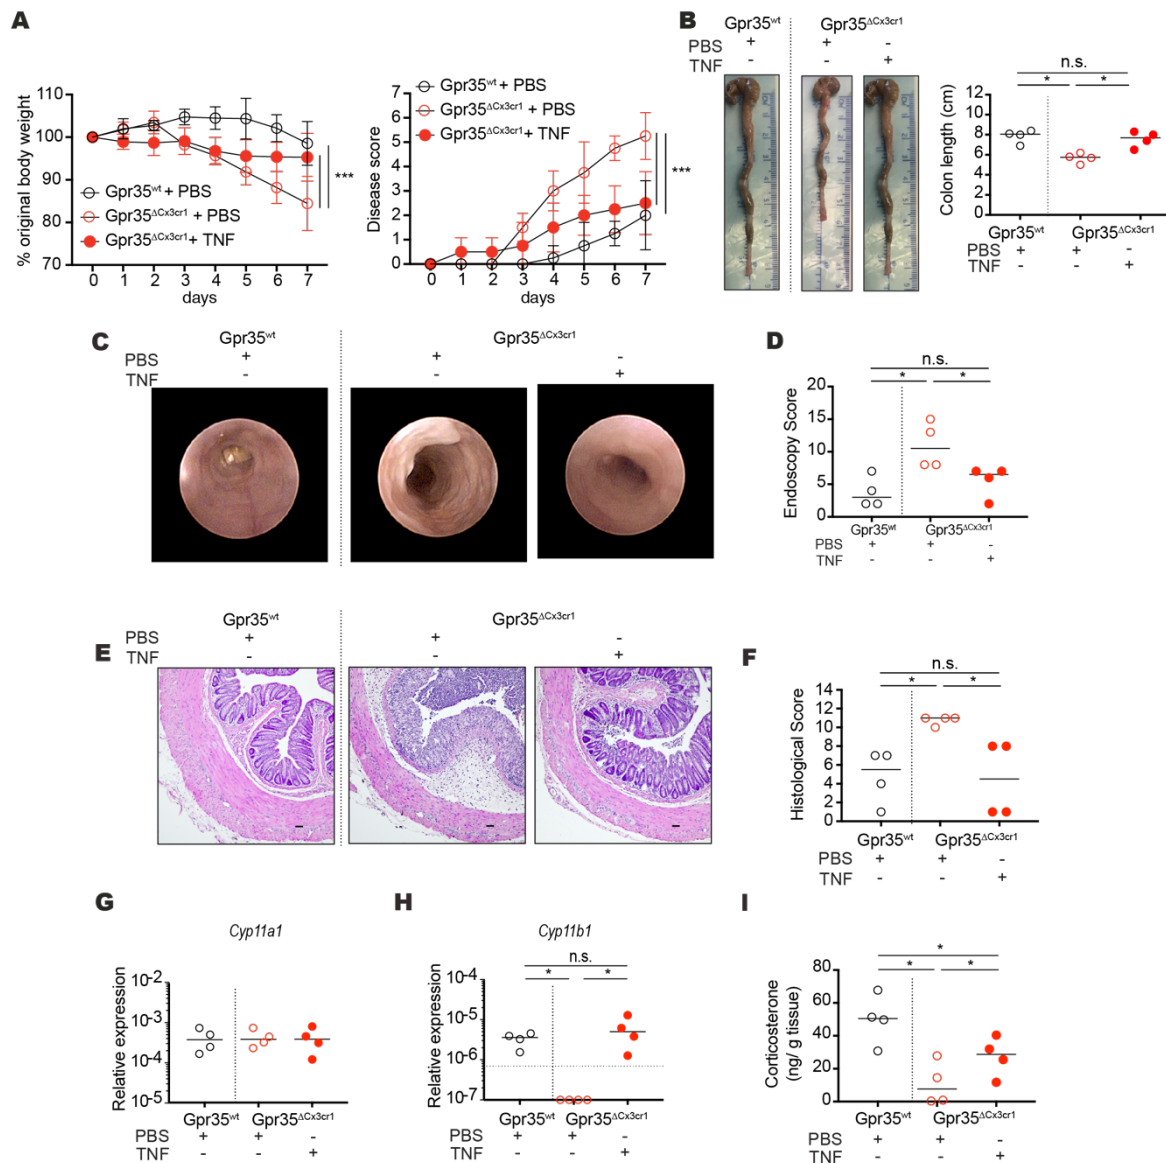

### Figure 7. TNF Treatment of *Gpr35<sup>ΔCx3cr1</sup>* Mice Attenuates Colitis

(A) Body weight changes (normalized to initial weight) during 8 days of DSS exposure from PBS-injected *Gpr35<sup>wt</sup>* (WT) and PBS- or TNF-injected tamoxifen-treated *Gpr35<sup>ΔCx3cr1</sup>* mice. Data are shown as mean  $\pm$  SD for four mice per group. Disease activity scores assessed by daily monitoring of DSS colitis of PBS-injected *Gpr35<sup>wt</sup>* and PBS- or TNF-injected tamoxifen-treated *Gpr35<sup>ΔCx3cr1</sup>* mice. Data are shown as mean  $\pm$  SD for four mice per group. (B) Colon lengths on day 7 of DSS colitis from PBS-injected *Gpr35<sup>wt</sup>* (WT) and PBS- or TNF-injected tamoxifen-treated *Gpr35<sup>ΔCx3cr1</sup>* mice. (C) Endoscopic images and (D) Quantified endoscopic scores. (E) Representative H&E microscopy images of colon of PBS-injected *Gpr35<sup>wt</sup>* and PBS- or TNF-injected tamoxifen-treated *Gpr35<sup>ΔCx3cr1</sup>* mice on day 7 of DSS colitis. Scale bar, 50  $\mu$ m. (F) histology scores. (G-H) mRNA expression levels of *Cyp11a1* (G) and *Cyp11b1* (H) relative to *Actb* by qRT-PCR in colon from PBS-injected *Gpr35<sup>wt</sup>* and PBS- or TNF-injected tamoxifen-treated *Gpr35<sup>ΔCx3cr1</sup>* mice on day 7 of DSS colitis. (I) Corticosterone concentration in supernatants of colonic explants of PBS-injected *Gpr35<sup>wt</sup>* and PBS- or TNF-injected tamoxifen-treated *Gpr35<sup>ΔCx3cr1</sup>* mice on day 7 of DSS colitis normalized to weights of colonic tissues. Data are presented as individual values with medians. Each dot represents one biological replicate. \* $p \leq 0.05$ , \*\* $p \leq 0.01$ , \*\*\* $p \leq 0.001$ , \*\*\*\* $p \leq 0.0001$  by two-way ANOVA with Tukey's multiple comparisons test (A, B) or Mann-Whitney (C, D, F, G, H, I).

353 **Discussion**

354 It has been proposed that the recognition of host- and/or microbial-derived metabolites by  
355 GPCRs plays a critical role in driving cytokine responses that facilitate tissue destruction and  
356 resolution of inflammation in the context of infection or IBD (Chen et al., 2019; Cohen et al.,  
357 2017). In this study, we used a combination of genetic mouse and zebrafish models to study  
358 the biological relevance of GPR35 signaling, which dysfunction has been associated with  
359 increased IBD susceptibility. We have shown that LPA activates GPR35 leading to the  
360 regulation of the cytokine intestinal milieu at steady state condition as well as during  
361 intestinal inflammation. Furthermore, GPR35 expression distinguishes two distinct  
362 macrophage populations and is required in CX3CR1<sup>+</sup> macrophages to trigger  
363 immunosuppressive pathways during intestinal inflammation.

364  
365 Previous studies have suggested several potential ligands of GPR35, however depending on  
366 the experimental settings and/or species the results have been rather inconsistent (Binti Mohd  
367 Amir et al., 2018; Mackenzie et al., 2011; Maravillas-Montero et al., 2015; Oka et al., 2010;  
368 Southern et al., 2013). Because interspecies variation in ligand pharmacology must be  
369 considered for GPR35 (Milligan, 2018) we used genetic zebrafish and mouse models that lack  
370 GPR35. Using this comparative approach, we show remarkably conserved inflammatory  
371 cytokine production upon LPA stimulation, which was GPR35-dependent. Moreover, mouse  
372 and zebrafish macrophages responded to LPA as a chemoattractant in a GPR35-dependent  
373 manner. Although we demonstrated that GPR35 was required in bone marrow-derived  
374 macrophages in vitro, our in vivo zebrafish experiments did not allow us to rule out that other  
375 GPR35<sup>+</sup> expressing cells sense LPA to then induce macrophage recruitment. Whether  
376 GPR35-dependent chemotaxis contribute to intestinal homeostasis and disease remains to be  
377 investigated. However, our findings suggest that LPA can activate GPR35 in zebrafish and  
378 mice, demonstrating that LPA-induced GPR35 signaling is conserved across species.

379

380 We found that both mice and zebrafish showed increased expression of *Atx*, which catalyzes  
381 the formation of LPA (Gesta et al., 2002), during inflammation. However, the degree to  
382 which host cells and/or microbiota contribute to LPA production has not been fully explored.  
383 One possibility is that the disruption of epithelial cells leads to the release of LPA or  
384 precursors that are further metabolized by lamina propria cells expressing ATX.

385 Phospholipids derived from microorganisms that constitute the intestinal microbiota may be  
386 another source of LPA during colitis (Cullinane et al., 2005). One recent study used mass  
387 spectrometry to distinguish microbial-derived versus host-derived metabolites by stable  
388 isotope tracing of <sup>13</sup>C-labeled live non-replicating *E. coli* from <sup>12</sup>C host isotopes (Uchimura et  
389 al., 2018). Our analysis of this published mass spectrometry data indicated that both host cells  
390 and microbes contribute to the LPA content in the colon. However, if LPA plays a role and  
391 the potential source during intestinal inflammation in IBD patients carrying the *GPR35*  
392 variant remains to be explored.

393

394 Antibiotic treatment of zebrafish and mice, in addition to expression analysis in germ-free  
395 mice, yielded insights into the modulation of GPR35 expression by the microbiota. Our  
396 results indicate that the microbiota modulates *Gpr35* expression in zebrafish and mouse. This  
397 microbiota dependence appeared to be specific to macrophages and was not observed in  
398 colonic epithelial cells, suggesting that the mechanism of *Gpr35* induction differs between  
399 cell compartments. Furthermore, the exposure of zebrafish to *V. anguillarum* indicated that  
400 pathogens may drive *gpr35* expression in zebrafish. This phenomenon was further confirmed  
401 in mice, in which *E. coli* induced the expression of *Gpr35* by CX3CR1<sup>+</sup> macrophages, which  
402 are known to extend processes between epithelial cells to sample commensals, pathogens, and  
403 fungi (Leonardi et al., 2018; Niess et al., 2005; Rossini et al., 2014). Chemically induced  
404 intestinal inflammation also resulted in enhanced *Gpr35* expression as observed in zebrafish

405 (TNBS-induced inflammation) and in mice (DSS-induced colitis). In agreement with the  
406 significant inflammation-induced increase of *Gpr35* expression in macrophages, *Gpr35*-  
407 deficient mice displayed more severe colitis compared to WT mice, and had reduced TNF  
408 production by macrophages.

409

410 TNF is a well-described pro-inflammatory cytokine that is central to the pathogenesis of  
411 Crohn's disease and ulcerative colitis, as increased numbers of TNF-producing mononuclear  
412 cells are present in the lamina propria of patients with Crohn's disease or ulcerative colitis  
413 (Reinecker et al., 1993). As a consequence, the inhibition of TNF with antibodies ameliorates  
414 colitis in animal models, and anti-TNF antibodies are essential for the treatment of patients  
415 with IBD (Corazza et al., 1999; Neurath et al., 1997; Present et al., 1999; Sands et al., 2001;  
416 Siegel et al., 1995). Our data suggest a model in which GPR35 signaling in macrophages  
417 induce TNF expression which is beneficial to maintain intestinal homeostasis, which might be  
418 in contradiction with the paradigm that TNF is pathogenic in IBD. In this line, some studies  
419 have shown that TNF has anti-inflammatory effects in the context of *Tnf*-deficient animals  
420 which result in more severe DSS-induced colitis (Naito et al., 2003; Noti et al., 2010). TNF is  
421 quickly released after tissue damage to reduce damage-associated mortality (Mizoguchi et al.,  
422 2008). Our data show that GPR35-dependent TNF induction result in induction of  
423 corticosterone production, which might in turn suppress immune responses. Therefore, TNF  
424 can play a protective or deleterious role depending on the context and stage of the disease. On  
425 the other hand, studies in macrophages carrying the IBD-associated T108M polymorphism in  
426 GPR35 result in enhanced metabolic activity compared to the wild type GPR35, which is the  
427 opposite effect compared to GPR35 loss of function (Schneditz et al., 2019; Tsukahara et al.,  
428 2017). This data suggests the possibility that IBD patients carrying the T108M polymorphism  
429 might have enhanced TNF production, which result in aberrant inflammatory immune  
430 responses.

431

432 We cannot exclude the possibility that other endogenous ligands may bind to GPR35 and that

433 LPA may also modulate the intestinal cytokine milieu by binding to other LPA receptors.

434 Before GPR35 can be considered as a possible target in the clinic for the treatment of IBD,

435 better pharmacological screenings must be considered to identify additional putative ligands

436 and inter-species variations of potential ligands. The identification of possible connections

437 between host- and microbial-derived metabolites with the immune system will be critical in

438 the future to dissect mucosal immune responses in healthy individuals and during colitis.



439 **Acknowledgments**

440 This work is part of the Ph.D. thesis of B.K. Philippe Demougin, Biozentrum, Basel.  
441 Christian Beisel, Genomics Facility Basel, ETH Zürich, helped with RNA-seq. Florian Geier,  
442 Bioinformatics Core, Department of Biomedicine, University of Basel, helped with the  
443 analysis of the RNA-seq data. Calculations were performed at the sciCORE  
444 (<http://scicore.unibas.ch/>) scientific computing center at the University of Basel. We thank all  
445 gastroenterologists who enrolled patients into the Swiss IBD Cohort. J.H.N. was supported by  
446 SNSF grants 310030\_175548 and 316030\_170809. T.K. was supported by SNSF M.D. Ph.D.  
447 fellowship 323530\_183981; the Swiss IBD Cohort Investigators were supported by SNSF  
448 grant 33CS30-148422. E.J.V. was supported by grants from the Swedish Research Council,  
449 VR grant K2015-68X-22765-01-6, Formas grant nr. FR-2016/0005, and the Wallenberg  
450 Academy Fellow program.

451

452 **Author Contributions**

453 B.K., C.D.C., Ph.W., O.E.D., R.A.M., H.M., T.K., S.D., and C.K.A. performed experiments.  
454 P.H. provided patient samples, and P.P.H provided *V. anguillarum* extracts. E.J.V. and J.H.N.  
455 conceived the idea. B.K., C.D.C., E.J.V., and J.H.N wrote the paper. All authors discussed the  
456 data, read, and approved the manuscript.

457

458 **Declaration of Interests**

459 None of the authors has a conflict of interest related to this article.

460

461 **Material and Methods**

462

463 **Mouse lines**

464 C57BL/6, *Rag2<sup>-/-</sup>*, *Cx3cr1*-GFP (B6.129P-Cx3cr1<sup>tm1Litt/J</sup>) and *Cx3cr1<sup>CreER</sup>* (B6.129P2(Cg)-

465 *Cx3cr1<sup>tm2.1(cre/ERT2)Litt/WganJ</sup>*) mice were bred and maintained in the animal facility of

466 Department of Biomedicine, University of Basel, Switzerland or the respective facility at the

467 Karolinska Institutet, Solna, Sweden. *Gpr35*-tdTomato, *Gpr35<sup>-/-</sup>* and *Gpr35<sup>lox/flox</sup>* animals were

468 constructed as described below. *Gpr35*-tdTomato mice were crossed with *Cx3cr1*-GFP mice

469 to generate double reporter mice, and *Gpr35<sup>lox/flox</sup>* were crossed with *Cx3cr1<sup>CreER</sup>* to obtain

470 *Gpr35<sup>ΔCX3CR1</sup>* mice, in which the tamoxifen-inducible, Cre-mediated recombination will lead

471 to the excision of GPR35 in CX3CR1<sup>+</sup> cells. All animals were kept under specific pathogen-

472 free (SPF) conditions. Germ-free C57BL/6 mice were obtained from the Core Facility for

473 Germ-Free Research at the Karolinska Institutet, Solna, Sweden. For in vivo and in vitro

474 experiments at least 3 mice per group were included. Animals between 6-12 weeks of age

475 were randomly selected for experimental groups. All mouse experiments were conducted in

476 accordance to the Swiss Federal and Cantonal regulations (animal protocol number 2832

477 (canton Basel-Stadt)) and the Stockholm regional ethics committee under approved ethical

478 number N89-15.

479

480 **Generation of *Gpr35*-IRES-tdTomato knock-in mice**

481 *Gpr35*-IRES-tdTomato knock-in mouse line was generated by Beijing Biocytogen (Beijing,

482 China) by introducing IRES-tdTomato between the protein coding sequences of the targeted

483 gene and 3'UTR under the genetic background of C57BL/6J. In brief, for construction of the

484 targeting vector, 4.7-kb left homology arm spanning exon 1 and an FRT-flanked neo cassette

485 were inserted 352bp upstream of exon 2; an internal ribosome entry site 2 (IRES2) sequence

486 (allows translation initiation in the middle of an mRNA sequence), a tdTomato reporter and

487 3.9-kb right homology arm were inserted just downstream of stop codon. The complete  
488 sequence of the targeting vector was verified by sequencing analysis. After linearization, the  
489 targeting vector was transfected into C57BL/6J embryonic stem (ES) cells by electroporation.  
490 Eight positive ES clones were identified by Southern blot analysis with 5'probe and 3'probe,  
491 and Karyotype analysis. Positive ES clones were injected into BALB/c blastocysts and  
492 implanted into pseudopregnant females. Four chimeric male mice were crossed with FLP  
493 females to obtain F1 mice carrying the recombined allele with the removal of Neo selection  
494 cassette. The F1 mice were validated for germinal line transmission of the recombination  
495 event by using the PCR strategy. The elimination of the neo cassette in the offspring was  
496 analyzed by PCR with the primers Frt-F2 and Frt-R2 (Table S1). Male and female  
497 heterozygous mice were crossed to produce homozygous mutant mice. Reporter animals were  
498 genotyped by PCR with primers listed in Table S3. Following PCR cycling parameters were  
499 used with 35 cycles of amplification: denaturation 95°C for 2 min; amplification 95°C 30 sec,  
500 62°C 30 sec, 72°C 25 sec; final elongation 72°C 10 min.

501

### 502 **Generation of Gpr35-flox and knock-out (KO) mice**

503 *Gpr35<sup>flox</sup>* and *Gpr35<sup>-/-</sup>* mice were generated using the CRISPR/Cas9 system by Beijing  
504 Biocytogen (Beijing, China). Briefly, the Cas9/guide RNA (gRNA) target sequences were  
505 designed to the regions upstream of exon2 and downstream of 3'UTR. The targeting construct  
506 of *Gpr35<sup>flox</sup>* consisting of 1.3 kb arms of homologous genomic sequence immediately  
507 upstream (5') of exon 2 and downstream (3') of 3'UTR flanked by two loxP sites (Figure  
508 S3A). Cas9 mRNA and sgRNAs were transcribed with T7 RNA polymerase in vitro. Cas9  
509 mRNA, sgRNAs and donor vector were mixed at different concentrations and co-injected into  
510 the cytoplasm of fertilized eggs at the one-cell stage. The genotypes for *Gpr35<sup>flox</sup>* and *Gpr35<sup>-/-</sup>*  
511 mice were validated by PCR amplification and direct sequencing. *Gpr35<sup>flox</sup>* mice were further  
512 validated by Southern blot analysis.

513 For *Gpr35* targeting, two sgRNAs were designed to target the regions upstream of exon 2 and  
514 downstream of 3'UTR. For each targeted site, candidate sgRNAs were designed using the  
515 CRISPR design tool (<http://www.sanger.ac.uk/htgt/wge/>). sgRNAs were screened for on-  
516 target activity using the UCA kit (Lin et al., 2016). Cas9 mRNA and sgRNAs were  
517 transcribed with T7 RNA polymerase in vitro. For Cas9 mRNA and sgRNA production, the  
518 T7 promoter sequence was added to the Cas9 and sgRNA templates by PCR amplification.  
519 T7-Cas9 and T7-sgRNA PCR products were gel purified and used as the template for in vitro  
520 transcription with the MEGAscript T7 kit (Life Technologies) according to the kit  
521 protocol. Cas9 mRNA and sgRNAs were purified using the MEGAclear kit and eluted with  
522 RNase-free water. The targeting construct of *Gpr35* flox consisting of 1.3 kb arms of  
523 homologous genomic sequence immediately upstream (5') of exon 2 and downstream (3') of  
524 3'UTR flanked by two loxP sites (Figure S3C). The donor vector was prepared using an  
525 endotoxin-free plasmid DNA kit. C57BL/6N females were used as embryo donors and  
526 pseudopregnant foster mothers. Superovulated C57BL/6N mice (3-4 weeks old) were mated  
527 to C57BL/6N stud males, and fertilized embryos were collected from the ampullae. Cas9  
528 mRNA, sgRNAs and donor vector were mixed at different concentrations and co-injected into  
529 the cytoplasm of fertilized eggs at the one-cell stage. After injection, surviving zygotes were  
530 transferred into the oviducts of KM pseudopregnant females. The genotyping of *Gpr35*-  
531 deficient animals was done by PCR in 2 different reactions using the listed primers (Table S3)  
532 under the following conditions: initial denaturation at 95°C for 3 min; 35 cycles of  
533 denaturation 95°C 30 sec, annealing 64°C 30 sec, elongation 72°C 45 sec; and final elongation  
534 72°C 10 min. The *Gpr35*-flox mice were genotyped by PCR (for primers see Table S3) by  
535 denaturing at 95°C for 3 min, amplifying 35 cycles at 95°C 30 sec, 62°C 30 sec, 72°C 35 sec  
536 and elongating at 72°C for 10 min.

537

538

539

540 **Zebrafish lines**

541 The *Tg(mpeg1:mCherry)* was kindly provided by Professor Georges Luftalla (Montpellier,  
542 France). The zebrafish predicted gene G-protein coupled receptor 35-like (LOC101882856)  
543 (mRNA sequence ID: XM\_021466387.1, previous Ensembl ID: ENSDARG00000075877,  
544 current Ensembl ID: ENSDARG00000113303) was targeted using a CRISPR-Cas9 approach  
545 by the Genome Engineering Zebrafish, Science for Life Laboratory (SciLifeLab), Uppsala,  
546 Sweden. CRISPR/Cas9 gene editing was performed as previously described (Li et al., 2016)  
547 and the gRNA was targeted within exon 2 in the reverse strand with a gene specific gRNA-  
548 target sequence followed by a protospacer adjacent motif (PAM), (5' GGT AGG CCA CAC  
549 GCT CAA ACA GG 3' – PAM sequence is underlined). Eggs from WT AB strain were co-  
550 injected with a total volume of 2nL consisting of a mix of 300 pg Cas9 mRNA and 25pg of  
551 sgRNA at the single-cell stage. Founder screening by somatic activity test (CRISPR-STAT)  
552 and germline transmission were assayed using fluorescence PCR as previously described (Li  
553 et al., 2016). Briefly, injection groups with somatic activity were grown to adulthood for  
554 founder screening and positively identified founders (F<sub>0</sub>) were in-crossed with another  
555 founder to screen for germline transmission in F<sub>1</sub> embryos. F<sub>1</sub> embryos were raised to  
556 adulthood, fin clipped and genotyped using fluorescence PCR followed by subsequent  
557 validation of the mutation using Sanger sequencing. F<sub>1</sub> heterozygotes were outcrossed with  
558 AB fish and the resulting F<sub>2</sub> heterozygotes were further maintained and in-crossed. The F<sub>3</sub>  
559 embryos were raised to adulthood and screened for homozygous mutants and wild type  
560 zebrafish by PCR based genotyping (WT forward primer: 5'- TAG CCT GTT TGA GCG TGT  
561 GG-3'; mutant forward primer: 5'- CCA TTA GCC TGT GGC CT -3'; common reverse primer: 5'-  
562 CAC CAG CGA TTT GGT CAG AA-3'), which were further in-crossed (i.e. 'mutant with  
563 mutant' and 'wildtype with wildtype') to generate mutant and WT embryos that were  
564 subsequently used for experiments. For the purpose of experiments, the mating was

565 performed in a random fashion at all occasions. For husbandry, embryos were kept and raised  
566 to adulthood in systems with circulating, filtered and temperature (28.5 °C) controlled water.  
567 All procedures were performed according to Swedish and European regulations and have  
568 been approved by the Uppsala University Ethical Committee for Animal Research (C161.14)  
569 and Karolinska Institutet Ethical Committee for Animal Research (N5756/17).

570 Primers used for fluorescence PCR: Forward M13F-tailed primer: 5'-TGT AAA ACG ACG  
571 GCC AGT CTC AAG CAA ACT GCT TCC TCT T-3'; Reverse PIG-tailed primer: 5'- GTG  
572 TCT TGC ATG TAG ATG TGA GTG TCG GT-3'; M13F FAM primer: /56FAM/ TGT  
573 AAA ACG ACG GCC AGT

574

#### 575 **Human inflammatory bowel disease biopsies**

576 The study population for mRNA analysis included 31 patients with Crohn's disease and 31  
577 patients with ulcerative colitis (20 with active disease, 11 in remission) recruited to Swiss  
578 Inflammatory Bowel Disease Cohort Study (SwissIBD cohort project 2016-12) started in  
579 2006 (Pittet et al., 2009). The diagnoses of Crohn's disease and ulcerative colitis were  
580 validated by endoscopy, radiology or surgery at least 4 months before recruitment of the  
581 patients. Patients with colitis or ileitis caused by other conditions or with no permanent  
582 residency in Switzerland were excluded from the study. Ileocolonoscopy was done to confirm  
583 quiescent IBD or to determine the activity in active IBD. For active IBD, biopsies were taken  
584 from macroscopically inflamed regions. Table S2 gives detailed depiction of patient  
585 information. After the collection, the biopsies were kept in RNeasy® stabilization solution  
586 (Qiagen) at -80°C until further use. The study population for immunofluorescence  
587 involved 4 ulcerative colitis and 3 Crohn's disease patients recruited to the Basel IBD cohort.  
588 The biopsies were taken from inflamed or non-inflamed regions of the same patients  
589 following ileocolonoscopy. The specimens were embedded in optimal cutting temperature  
590 (OCT) compound (TissueTek) and stored at -80°C. Table S3 shows the detailed patient

591 characteristics (ethics protocol EKBB 139/13 (PB 2016.02242) (Ethics Committee for  
592 Northwest and Central Switzerland (EKNZ).

593

#### 594 **Cell lines**

595 The human colon adenocarcinoma HT29 (ATCC, HTB-38) cell line was cultured in  
596 Dulbecco's Modified Eagle Medium (DMEM)- GlutaMAX (Invitrogen) with 10% FBS  
597 (Invitrogen), 100 U/mL penicillin and 0.1 mg/mL streptomycin (Invitrogen). The cells were  
598 incubated at 37°C, 5% CO<sub>2</sub> and medium were changed every 3 days and cells were passaged  
599 with 0,05% trypsin-EDTA (Invitrogen) twice per week.

600

#### 601 **Dextran sodium sulfate induced colitis mouse model**

602 Weight-matched 6 to 12-week-old female mice were administered with 1.5-2.5% DSS (MP  
603 Biomedicals) in the drinking water for 5 days followed by 2 days of normal drinking water.  
604 Mice were daily weighed and monitored for clinical colitis score. Clinical colitis scores were  
605 calculated according to the following criteria (Steinert et al., 2017): rectal bleeding: 0 - absent,  
606 1 - bleeding; stool consistency: 0 - normal, 1 - loose stools, 2 - diarrhea; position: 0 - normal  
607 movement, 1 - reluctant to move, 2 - hunched back; fur: 0 - normal, 1 - ruffled, 2 - spiky;  
608 weight loss: 0 - no loss, 1 - body weight loss 0-5%, 2 - body weight loss >5 - 10%, 3 - body  
609 weight loss > 10 - 15%, 4 - body weight loss > 15%. Endpoints of the experiment are total  
610 score of  $\geq 6$ , > 15 % body weight loss, excessive bleeding, and rectal prolapse.

611

#### 612 **Hematoxylin-eosin (H&E) staining and histological scoring**

613 5  $\mu$ m paraffin sections from mouse colon were stained with H&E. Histological scores for  
614 colonic inflammation were assessed semi-quantitatively using the following criteria (Souza et  
615 al., 2017; Steinert et al., 2017): mucosal architecture (0:normal, 1-3: mild-extensive damage);  
616 cellular infiltration (0:normal, 1-3: mild-transmural); goblet cell depletion (0:no, 1:yes); crypt

617 abscesses (0:no, 1:yes); extend of muscle thickening (0: normal, 1-3: mild-extensive). Tissues  
618 were scored by at least two blinded investigators and data is presented by the mean.

619

## 620 **Mouse Endoscopy**

621 To assess macroscopic colitis severity, mice were anaesthetized with 100 mg/kg body weight  
622 ketamine and 8 mg/kg body weight Xylazine intraperitoneally. The distal 3 cm of the colon  
623 and the rectum were examined with a Karl Storz Tele Pack Pal 20043020 (Karl Storz  
624 Endoskope, Tuttlingen, Germany) as previously described (Melhem et al., 2017).

625

## 626 **Treatment of zebrafish with 2,4,6-Trinitrobenzenesulfonic acid or with antibiotics**

627 To induce inflammation, zebrafish larvae were either untreated or treated with 2,4,6-  
628 Trinitrobenzenesulfonic acid (TNBS; Sigma Aldrich P2297) from day 3 post-fertilization  
629 until 120 hpf. TNBS was added in a 1:1000 dilution in E3 water (final concentration: 50  
630  $\mu\text{g}/\text{mL}$ ) and replaced every 24 hours. To deplete the bacterial content, zebrafish larvae were  
631 treated with an antibiotic cocktail from day 3 post-fertilization until 120 hpf (Bates et al.,  
632 2006). The antibiotic cocktail consists of Ampicillin (100  $\mu\text{g}/\text{ml}$ ) and Kanamycin (5  $\mu\text{g}/\text{ml}$ )  
633 that was added to E3 water and replaced every 24 hours.

634

## 635 **Treatment of mice with antibiotics**

636 WT mice were treated with antibiotic cocktail for 10 consecutive days by oral gavage. The  
637 antibiotic cocktail contains Ampicillin (1mg/ml), Kanamycin (1mg/ml), Gentamicin  
638 (1mg/ml), Metronidazole (1mg/ml), Neomycin (1mg/ml), and Vancomycin (0.5mg/ml).

639

## 640 **Preparation of sense and antisense Digoxigenin (DIG)-labeled RNA probes for detection** 641 **of *Gpr35b* in zebrafish**



642 DNA plasmid containing *Gpr35b* cDNA (5  $\mu$ g) was linearized in a 2 h digestion, using SacI  
643 and EcoRI to generate the sense and anti-sense probe template, respectively. The linearized  
644 plasmid was purified by phenol: chloroform extraction method followed by ethanol  
645 precipitation. Following successful production of template, the in vitro synthesis of the sense  
646 and antisense DIG-Labeled RNA probes were made in a 2 hours incubation at 37 °C with the  
647 following transcription mix (20  $\mu$ L): DNA template (1-2  $\mu$ g), DIG-RNA labeling mix,  
648 protector RNase Inhibitor, transcription buffer and RNA Polymerase T7 and T3, respectively.  
649 Following the incubation, DNA template was digested by adding DNase I for 30 min at 37 °C  
650 and was stopped by adding 2  $\mu$ l of 0.2 M EDTA. DIG-Labeled RNA Probes were precipitated  
651 by LiCl method and resuspended in 30  $\mu$ l Probe solution (19  $\mu$ l sterilized water, 10  $\mu$ l  
652 RNAlater and 1  $\mu$ l 0.5M EDTA).

653

#### 654 **In situ hybridization for *gpr35b* detection in zebrafish**

655 *In situ* hybridization (ISH) was performed in whole zebrafish larvae from the developmental  
656 stages 72 hpf, 96 hpf and 120 hpf. Those larvae were fixed by 4% paraformaldehyde (PFA) in  
657 PBS at 4 °C overnight followed 3 PBS washes. Progressive dehydration by washing for 5 min  
658 in 25%, 50% and 75% methanol in PBS and final 5- and 15-min wash in 100% methanol were  
659 performed. In some cases, the depigmentation method was required due to their  
660 developmental stage. In this case, larvae were treated with 3% H<sub>2</sub>O<sub>2</sub>/0.5% KOH at RT until  
661 pigmentation has completely disappeared and then progressive dehydration was performed as  
662 described above. Larvae were placed at -20 °C for at least 2 h. After incubation, larvae were  
663 rehydrated, washed 4 times with PBST (0.1% Tween-20 in PBS) followed by proteinase K  
664 (10  $\mu$ g/mL) treatment at RT for a time defined by the developmental state such is indicated  
665 coming up next: 72 hpf – 20 min; 96 hpf – 30 min; and 120 hpf – 40 min. Proteinase K  
666 digestion was stopped by incubating the larvae for 20 min in 4% PFA. Larvae were washed  
667 with PBST and prehybridized with 700  $\mu$ L hybridization mix (HM) solution (50% deionized

668 formamide (Millipore); 0.1% Tween-20 (Sigma); 5X saline sodium citrate solution (Merck);  
669 50mg/ML of heparin (Sigma); 500 mg/mL RNase-free tRNA (Sigma)) for 5 h at 70 °C. HM  
670 solution was replaced by 200  $\mu$ L of HM containing 50 ng of antisense/sense DIG-labeled  
671 RNA probe and incubated overnight at 70 °C. Then the larvae went through several washing  
672 steps with SSC and PBST solution followed by incubation with blocking buffer for 4h at RT.  
673 Afterward, larvae were incubated with anti-DIG-AP antibody solution overnight at 4 °C.  
674 Subsequently, they were washed 6 times for 15 min with gentle agitation on a horizontal  
675 shaker, incubated with alkaline Tris buffer for 5 min at RT with gentle agitation, and stained  
676 in dark using 700  $\mu$ L staining solution. When the color was developed, the reaction was  
677 stopped by adding stop solution (1mM EDTA and 0.1% Tween-20 in PBS pH 5.5). Finally,  
678 larvae were transferred to a tube containing 100% glycerol and kept in this solution at least 24  
679 h before mounting them.

680

#### 681 **Challenging of mice with *E. coli*-CFP**

682 *E. coli* DH10B pCFP-OVA was constructed as previously described (Rossini et al., 2014).  
683 Gpr35-tdTomato x Cx3cr1-GFP mice were gavaged every other day for 21 days with  $1 \times 10^8$   
684 CFUs of CFP-OVA<sup>+</sup> *E. coli* and sacrificed for further analysis.

685

#### 686 **Exposure of zebrafish with *Vibrio anguillarum***

687 *V. anguillarum* strain 1669 was grown in tryptic soy broth medium to OD<sub>600</sub> (optical density  
688 at 600 nm) 1.5. Bacterial pellet (9 ml of full-grown culture) was resuspended in NaCl (9 g/L),  
689 0.35% formaldehyde, and incubated overnight at 20°C. The suspension was washed four  
690 times in NaCl(9 g/L) and resuspended in 800 ml of the same isotonic solution. *V. anguillarum*  
691 extract was mixed in a 1:1 ratio with phenol red (Sigma Aldrich P0290). One  $\mu$ L of this  
692 mixture was diluted with 2  $\mu$ L PBS from which 2 nL were used to be injected in the intestinal  
693 lumen of 110 hpf zebrafish larvae. Larvae were anesthetized using 0.0016% Tricaine MS0222

694 (Sigma-Aldrich E10521). Larvae were then monitored for recovery and analyzed 6 h post  
695 injection.

696

### 697 **LPA injection in zebrafish.**

698 LPA (10  $\mu$ M) or equal volume of DMSO were mixed with FITC-Dextran (500  $\mu$ g/ml) in  
699 PBS. For the challenge, 2 nl were injected in the otic vesicle of 110 hpf larvae anesthetized  
700 with 0.0016% Tricaine MS-222. Larvae were then monitored for recovery and macrophage  
701 recruitment was analyzed 6 h after the injection.

702

### 703 **Stimulation of zebrafish larvae with LPA**

704 WT and *gpr35b<sup>uu1892</sup>* zebrafish larvae were either left unstimulated or stimulated with 10  $\mu$ M  
705 LPA (Sigma L7260) in water from 96 hpf until 120 hpf. After the incubation, zebrafish larvae  
706 were lysed, RNA extracted, and cytokine production was evaluated by qPCR using primers  
707 listed in Table S3.

708

### 709 **Cell Isolation from the small and large intestinal lamina propria, mesenteric lymph 710 nodes and spleen**

711 Colonic lamina propria cells were isolated as described previously (Radulovic et al., 2019)  
712 (Steinert et al., 2017). Briefly, extracted colon or small intestine segments were opened  
713 longitudinally and washed with PBS (Sigma-Aldrich). IECs were dissociated using 5 mM  
714 EDTA at 37 °C in a shaking water bath at 200 rpm for 10 minutes. The dissociation step was  
715 repeated in fresh EDTA solutions for 2 additional times. The tissue was vortexed for 30 sec  
716 before and after each incubation and IECs were collected for further processing, if necessary.  
717 After removing IECs, the tissue was immersed in PBS to wash the EDTA away and cut into  
718 small pieces for digestion. The tissue was digested in Roswell Park Memorial Institute  
719 (RPMI) 1640 (Sigma-Aldrich) containing 0.5 mg/ml Collagenase type VIII (Sigma-Aldrich)

720 and 10 U/mL DNase (Roche) for 15-20 min at 37 °C in shaking water bath with 30 sec  
721 vortexing each 5 min. Digested tissue was passed through a 70 µm cell strainer and single cell  
722 suspension was pelleted for further analysis.

723 Spleen and MLN cells were isolated by mashing the tissue with a syringe plunger on a 70 µm  
724 cell strainer. Spleen red blood cells (RBCs) were lysed using ammonium-chloride-potassium  
725 buffer (150 mM NH<sub>4</sub>Cl, 10 mM KHCO<sub>3</sub>, 0.1 mM 0.5 M EDTA). Remaining cells were  
726 pelleted for further use.

727

### 728 **Antibodies, cell staining and flow cytometry**

729 Up to 5x10<sup>6</sup> isolated cells were incubated for 30 min at 4 °C with anti-CD16/CD32 (Fc  
730 receptor) clone 93 (Invitrogen) to block non-specific binding and with fixable viability dye  
731 eFluor455UV (eBioscience) for live/dead cell exclusion. Cells were washed in PBS  
732 containing 2% Fecal Bovine Serum (FBS), 0.1% sodium azide, and 10 mM EDTA (FACS  
733 buffer) and stained for surface antigens for 20 min at 4 °C. For intracellular staining, cells  
734 were further fixed and permeabilized in Cytofix/Cytoperm solution according to the  
735 manufacturer's instructions (BD Biosciences) followed by incubation with antibodies against  
736 intracellular antigens for 20 min at 4 °C. Cells were then resuspended in FACS buffer and  
737 flow cytometric analysis was performed on a Fortessa flow cytometer (BD Biosciences). Data  
738 was analyzed using FlowJo software version 10.0.7r2 (TreeStar). In all experiments, doublet  
739 discrimination was done on forward scatter (FSC-H) versus FSC-A plot. Mononuclear  
740 phagocyte staining was done using antibodies eVolve655-conjugated anti-CD45 clone 30-F11  
741 (eBioscience), Biotin-labeled anti- CD3 clone 145-2C11, anti- CD19 clone 6D5 and anti-  
742 NK.1.1 clone PK136, AF700-conjugated anti- I-A/I-E (MHCII) clone M5/114.15.2, PE/Cy7-  
743 conjugated anti- CD64 clone X54-5/7.1, APC/Cy7-conjugated anti-CD11c clone N418, FITC-  
744 conjugated anti- CD11b clone M1/70, PerCP/Cy5.5- conjugated anti-Ly6C clone HK1.4, and

745 APC-conjugated anti- Ly6G clone 1A8 (all BioLegend). For lineage exclusion, CD3<sup>+</sup>, CD19<sup>+</sup>  
746 and NK1.1<sup>+</sup> cells were gated out. For lymphocyte staining, antibodies for APC/Cy7-  
747 conjugated anti-CD45 clone 30-F11, AF700- conjugated anti-CD3 clone 17A2, BV785-  
748 conjugated anti-CD19 clone 6D5, BV510-conjugated anti-CD4 clone RM4-5 and PerCP-  
749 conjugated anti-CD8a clone 53-6.7 or Biotin-labeled anti-CD8 clone 53-6.7 (all BioLegend)  
750 were used. For innate lymphoid cell panel, antibodies APC/Cy7- conjugated anti-CD90.2  
751 clone 30-H12 (BioLegend), APC-conjugated anti-GATA3 clone 16E10A23 (BioLegend),  
752 PerCP/Cy5.5-conjugated anti-ROR $\gamma$ T clone Q31-378 (BD Biosciences), PE/Cy7-conjugated  
753 anti-T-bet clone 4B10 (BioLegend) and FITC-conjugated anti-Eomes clone WD1928  
754 (Invitrogen) were included whereas Biotin-conjugated antibodies anti-CD3 145-2C11, anti-  
755 CD8a 53-6.7, anti-CD19 6D5, anti-CD11c N418 (all BioLegend), anti-B220 RA3-6B2 (BD  
756 Biosciences), anti-Gr-1 RB6-8C5, anti-TCR $\beta$  H57-597, anti-TCR $\gamma\delta$  GL3 and anti-Ter119  
757 TER-119 (all BioLegend) were used for lineage exclusion. eFluor450 conjugated Streptavidin  
758 (eBioscience) was used for all biotin labeled antibodies.

759

## 760 **RNA extraction and quantitative PCR**

761 RNA was extracted from cells, mouse or zebrafish tissues, whole zebrafish larvae or human  
762 biopsies using TRI Reagent (Zymo Research) or TRIzol (Invitrogen) according to the  
763 manufacturer's instructions. For DSS-treated mouse colonic tissue, Direct-zol RNA MiniPrep  
764 kit (Zymo Research) was used to remove the DSS residues. RNA samples were treated with  
765 TURBO DNase (Invitrogen) and reverse transcribed using High Capacity cDNA Reverse  
766 Transcription (Applied Biosystems) or iScript cDNA synthesis (Bio-Rad) kits by following  
767 manufacturer's instructions. Quantitative PCR was performed using primers listed in Table S3  
768 and QuantiNova SYBR Green PCR (Qiagen) or iTaq<sup>TM</sup> Universal SYBR<sup>®</sup> Green Supermix  
769 (Bio-Rad) kits. Samples were run on an ABI ViiA 7 cyclor or a CFX384 Touch Real-Time

770 PCR. Ct values were normalized to that of *efal*, *Hrpt*, *Gapdh* or *Actb* and relative expression  
771 was calculated by the formula  $2^{(-\Delta Ct)}$ . Used primers are listed in Table S1.

772

### 773 **Immunofluorescence staining**

774 Human biopsies were provided by the Basel IBD cohort in cryoblocks. Mouse tissues were  
775 fixed with 4% PFA and left in 30% sucrose overnight for cryo-embedding or dehydrated in  
776 ethanol solutions for paraffin embedding. All tissues were sectioned at 6  $\mu\text{m}$  and fixed with  
777 4% PFA. Blocking and permeabilizing were done using PBS containing 0.4% Triton X-100  
778 for cryosections or 0.1% Tween20 for paraffin sections and 5% goat serum (all Sigma-  
779 Aldrich). Tissue sections were stained with rabbit polyclonal anti-human/mouse GPR35  
780 primary antibody and goat anti-rabbit IgG secondary antibody. For all samples, NucBlue™  
781 Live Cell Stain (Thermo Fisher) was used for nuclear staining and samples were imaged using  
782 a Nikon A1R confocal microscope.

783

### 784 **Autotaxin staining**

785 Mouse tissues were fixed with 4% PFA and dehydrated in ethanol solutions for paraffin  
786 embedding. All tissues were sectioned between 5-6  $\mu\text{m}$ . Endogenous peroxidase activity was  
787 blocked with 3%  $\text{H}_2\text{O}_2$  solution in methanol and antigen retrieval to unmask the antigenic  
788 epitope was performed with EDTA buffer (1mM EDTA, pH 8.0). Blocking was done using  
789 BLOXALL™ Blocking Solution (Vector Laboratories SP-6000). Tissue sections were stained  
790 with mouse monoclonal anti-ENPP2 (autotaxin) Mouse/Human primary antibody (Abcam  
791 ab77104) and goat anti-rabbit IgG secondary antibody. All samples were additionally stained  
792 with H&E as described previously.

793

### 794 ***Ex vivo* imaging of colonic tissues**

795 Extracted colon was washed with PBS, opened longitudinally and placed on a slide. A drop of  
796 PBS was added to prevent the tissue from drying and tissue was covered with a coverslip.  
797 Tissues were imaged on a Nikon A1R confocal microscope.

798

### 799 **RNA sequencing**

800 RNA was isolated from sorted GPR35<sup>+</sup> and GPR35<sup>-</sup> colonic macrophages from 1 or 2 *Gpr35*-  
801 tdTomato mice. RNA quality control was performed with an Agilent 2100 Bioanalyzer and  
802 the concentration was measured by using the Quanti-iT RiboGreen RNA assay Kit (Life  
803 Technologies). cDNA was prepared using SMART-Seq v4 Ultra Low Input RNA Kit  
804 (Tamara). Sequencing libraries were prepared using Nextera XT DNA Library Preparation  
805 Kit (Illumina). Indexed cDNA libraries were pooled in equal amounts and sequenced SR81  
806 with an Illumina NextSeq 500 Sequencing system. Reads were aligned to the mouse genome  
807 (UCSC version mm10) with STAR (version 2.5.2a) using the multi-map settings '`—`  
808 `outFilterMultimapNmax 10 --outSAMmultNmax 1`' (Dobin et al., 2013). Read and alignment  
809 quality was evaluated using the `qQCReport` function of the R/Bioconductor package `QuasR`  
810 (R version 3.4.2, Bioconductor version 3.6) (Gaidatzis et al., 2015). Assignment of reads to  
811 genes employed the UCSC refGene annotation (downloaded 2015-Dec-18). `QuasR` function  
812 `qCount` function was used to count the number of read (5'ends) overlapping with the exons of  
813 each gene assuming an exon union model. Differential gene expression analysis was  
814 performed using the R/Bioconductor package `edgeR` (McCarthy et al., 2012). After filtering  
815 genes with `logCPM`>1 in at least 1 sample, a paired design analysis was performed taking  
816 group and animal ID into account. Differential expression statistics for the `GPR35_Plus` vs.  
817 `GPR35_Minus` group contrast employed the `glmQLFit` and `glmQLFTest` functions of `edgeR`.  
818 Resulting P-Values were false discovery rate adjusted. RNA-seq data shown in Figure 4B has  
819 been obtain from a dataset published elsewhere (Czarnewski et al., 2019).

820

821 **3'-5'-Cyclic adenosine monophosphate (cAMP) assay**

822 To screen potential GPR35 ligands, the cAMP Hunter™ eXpress assay platform (Eurofins)  
823 was used according to the manufacturer's directions. Briefly, GPR35-transfected CHO-K1  
824 cells were thawed and  $3 \times 10^5$  cells were seeded on a 96-well plate followed by overnight  
825 incubation at 37 °C, 5% CO<sub>2</sub>. Cells were treated at 37 °C for 30 minutes with 15 μM Forskolin  
826 and 1:3 serial dilutions of potential ligands with the following starting concentrations: 10 μM  
827 recombinant human CXCL17 (R&D Systems), 10 μM lysophosphatidic acid (LPA) or 10 mM  
828 kynurenic acid (KYNA) (both Sigma-Aldrich). Zaprinst (Sigma-Aldrich) was used as a  
829 positive control. cAMP levels were measured by enzyme-fragment complementation (EFC)  
830 technology where two fragments of β-galactosidase were used. In presence of cAMP, cAMP  
831 labelled with one part of the enzyme is outcompeted to bind to anti-cAMP antibody and  
832 therefore is free to complement the enzyme complex and cleave the substrate to produce a  
833 luminescent signal. The signal was then measured by Synergy H1 Microplate Reader  
834 (Biotek).

835

836 **Mouse bone marrow-derived macrophages**

837 Femur and tibias from WT or *Gpr35*-deficient mice were cut at both ends and bone marrow  
838 was flushed out with PBS with the help of a syringe with 25-gauge needle. The cells were  
839 collected and cultured in RPMI 1640 containing 10% FBS, 0.05 mM 2-ME, 100 U/mL  
840 penicillin and 100 μg/mL streptomycin supplemented with 20 ng/mL M-CSF (BioLegend) at  
841 a density of  $2 \times 10^5$  cells/mL. Cells were incubated at 37 °C, 5% CO<sub>2</sub>, and the medium was  
842 exchanged on day 3 and 5 of the culture. On day 7, the BMDMs were stimulated with 10 μM  
843 LPA for 4 hours and collected in TRIzol for RNA extraction.

844

845 **Transwell migration assay**



846  $5 \times 10^5$  BMDMs were seeded on inserts with 5  $\mu\text{m}$  pore size (Corning). RPMI 1640 containing  
847 2% FBS with 10  $\mu\text{M}$  LPA was placed in the outer chamber. The cells were allowed to migrate  
848 for 18 hours. Migrated cells and the cells in the upper chamber were collected and  
849 resuspended in 200  $\mu\text{l}$  of FACS buffer. 70  $\mu\text{l}$  of each sample was acquired using BD Accuri™  
850 C6 flow cytometer (BD Biosciences) and percentage of migrated cells was calculated.

851

### 852 **Enzyme linked immunosorbent assays (ELISA) for corticosterone detection**

853 Corticosterone concentrations were determined in mouse colonic explants, which had been  
854 incubated for 24 hours in 24-well plates in 500  $\mu\text{l}$  of DMEM containing 2% FBS and 100  
855 U/mL penicillin and 0.1 mg/mL streptomycin. Corticosterone levels were determined using  
856 the Corticosterone Competitive ELISA kit (Invitrogen) and normalized to the weights of  
857 colon pieces measured before the assay.

858

### 859 **Statistical analysis**

860 Data are presented as dot plots of individual values with medians. GraphPad Prism software  
861 was used to graph the data and calculate statistical significance. P values were calculated  
862 using either unpaired t-test, Mann-Whitney U or two-way ANOVA tests depending on the  
863 experimental setting. Data were further analyzed by Grubbs' test to identify the outliers. For  
864 all tests p values were indicated as followed: \*:  $p \leq 0.05$ , \*\*:  $p \leq 0.005$ , \*\*\*:  $p \leq 0.0005$

865 **References**

- 866 Bain, C.C., Scott, C.L., Uronen-Hansson, H., Gudjonsson, S., Jansson, O., Grip, O.,  
867 Williams, M., Malissen, B., Agace, W.W., and Mowat, A.M. (2013). Resident and pro-  
868 inflammatory macrophages in the colon represent alternative context-dependent fates of the  
869 same Ly6Chi monocyte precursors. *Mucosal Immunol* 6, 498-510.
- 870 Bates, J.M., Mittge, E., Kuhlman, J., Baden, K.N., Cheesman, S.E., and Guillemin, K. (2006).  
871 Distinct signals from the microbiota promote different aspects of zebrafish gut differentiation.  
872 *Dev Biol* 297, 374-386.
- 873 Bernshtein, B., Curato, C., Ioannou, M., Thaiss, C.A., Gross-Vered, M., Kolesnikov, M.,  
874 Wang, Q., David, E., Chappell-Maor, L., Harmelin, A., *et al.* (2019). IL-23-producing IL-  
875 10 $\alpha$ -deficient gut macrophages elicit an IL-22-driven proinflammatory epithelial cell  
876 response. *Sci Immunol* 4.
- 877 Binti Mohd Amir, N.A.S., Mackenzie, A.E., Jenkins, L., Boustani, K., Hillier, M.C.,  
878 Tsuchiya, T., Milligan, G., and Pease, J.E. (2018). Evidence for the Existence of a CXCL17  
879 Receptor Distinct from GPR35. *J Immunol* 201, 714-724.
- 880 Chen, H., Nwe, P.K., Yang, Y., Rosen, C.E., Bielecka, A.A., Kuchroo, M., Cline, G.W.,  
881 Kruse, A.C., Ring, A.M., Crawford, J.M., and Palm, N.W. (2019). A Forward Chemical  
882 Genetic Screen Reveals Gut Microbiota Metabolites That Modulate Host Physiology. *Cell*  
883 177, 1217-1231 e1218.
- 884 Cohen, L.J., Esterhazy, D., Kim, S.H., Lemetre, C., Aguilar, R.R., Gordon, E.A., Pickard,  
885 A.J., Cross, J.R., Emiliano, A.B., Han, S.M., *et al.* (2017). Commensal bacteria make GPCR  
886 ligands that mimic human signalling molecules. *Nature* 549, 48-53.
- 887 Corazza, N., Eichenberger, S., Eugster, H.P., and Mueller, C. (1999). Nonlymphocyte-derived  
888 tumor necrosis factor is required for induction of colitis in recombination activating gene  
889 (RAG)2(-/-) mice upon transfer of CD4(+)CD45RB(hi) T cells. *J Exp Med* 190, 1479-1492.
- 890 Cullinane, M., Baysse, C., Morrissey, J.P., and O'Gara, F. (2005). Identification of two  
891 lysophosphatidic acid acyltransferase genes with overlapping function in *Pseudomonas*  
892 *fluorescens*. *Microbiology* 151, 3071-3080.
- 893 Czarnewski, P., Parigi, S.M., Sorini, C., Diaz, O.E., Das, S., Gagliani, N., and Villablanca,  
894 E.J. (2019). Conserved transcriptomic profile between mouse and human colitis allows  
895 unsupervised patient stratification. *Nat Commun* 10, 2892.
- 896 Dobin, A., Davis, C.A., Schlesinger, F., Drenkow, J., Zaleski, C., Jha, S., Batut, P., Chaisson,  
897 M., and Gingeras, T.R. (2013). STAR: ultrafast universal RNA-seq aligner. *Bioinformatics*  
898 29, 15-21.

899 Ellinghaus, D., Folseraas, T., Holm, K., Ellinghaus, E., Melum, E., Balschun, T., Laerdahl,  
900 J.K., Shiryayev, A., Gotthardt, D.N., Weismuller, T.J., *et al.* (2013). Genome-wide association  
901 analysis in primary sclerosing cholangitis and ulcerative colitis identifies risk loci at GPR35  
902 and TCF4. *Hepatology* 58, 1074-1083.

903 Farooq, S.M., Hou, Y., Li, H., O'Meara, M., Wang, Y., Li, C., and Wang, J.M. (2018).  
904 Disruption of GPR35 Exacerbates Dextran Sulfate Sodium-Induced Colitis in Mice. *Dig Dis*  
905 *Sci* 63, 2910-2922.

906 Gaidatzis, D., Lerch, A., Hahne, F., and Stadler, M.B. (2015). QuasR: quantification and  
907 annotation of short reads in R. *Bioinformatics* 31, 1130-1132.

908 Gesta, S., Simon, M.F., Rey, A., Sibrac, D., Girard, A., Lafontan, M., Valet, P., and Saulnier-  
909 Blache, J.S. (2002). Secretion of a lysophospholipase D activity by adipocytes: involvement  
910 in lysophosphatidic acid synthesis. *J Lipid Res* 43, 904-910.

911 Gunther, C., Martini, E., Wittkopf, N., Amann, K., Weigmann, B., Neumann, H., Waldner,  
912 M.J., Hedrick, S.M., Tenzer, S., Neurath, M.F., and Becker, C. (2011). Caspase-8 regulates  
913 TNF-alpha-induced epithelial necroptosis and terminal ileitis. *Nature* 477, 335-339.

914 Hanauer, S.B., Feagan, B.G., Lichtenstein, G.R., Mayer, L.F., Schreiber, S., Colombel, J.F.,  
915 Rachmilewitz, D., Wolf, D.C., Olson, A., Bao, W., *et al.* (2002). Maintenance infliximab for  
916 Crohn's disease: the ACCENT I randomised trial. *Lancet* 359, 1541-1549.

917 Hedl, M., and Abraham, C. (2011). Secretory mediators regulate Nod2-induced tolerance in  
918 human macrophages. *Gastroenterology* 140, 231-241.

919 Imielinski, M., Baldassano, R.N., Griffiths, A., Russell, R.K., Annese, V., Dubinsky, M.,  
920 Kugathasan, S., Bradfield, J.P., Walters, T.D., Sleiman, P., *et al.* (2009). Common variants at  
921 five new loci associated with early-onset inflammatory bowel disease. *Nat Genet* 41, 1335-  
922 1340.

923 Lassen, K.G., McKenzie, C.I., Mari, M., Murano, T., Begun, J., Baxt, L.A., Goel, G.,  
924 Villablanca, E.J., Kuo, S.Y., Huang, H., *et al.* (2016). Genetic Coding Variant in GPR65  
925 Alters Lysosomal pH and Links Lysosomal Dysfunction with Colitis Risk. *Immunity* 44,  
926 1392-1405.

927 Lattin, J.E., Schroder, K., Su, A.I., Walker, J.R., Zhang, J., Wiltshire, T., Saijo, K., Glass,  
928 C.K., Hume, D.A., Kellie, S., and Sweet, M.J. (2008). Expression analysis of G Protein-  
929 Coupled Receptors in mouse macrophages. *Immunome Res* 4, 5.

930 Leonardi, I., Li, X., Semon, A., Li, D., Doron, I., Putzel, G., Bar, A., Prieto, D., Rescigno, M.,  
931 McGovern, D.P.B., *et al.* (2018). CX3CR1(+) mononuclear phagocytes control immunity to  
932 intestinal fungi. *Science* 359, 232-236.

- 933 Li, M., Zhao, L., Page-McCaw, P.S., and Chen, W. (2016). Zebrafish Genome Engineering  
934 Using the CRISPR-Cas9 System. *Trends Genet* 32, 815-827.
- 935 Lin, Z., Li, S., Feng, C., Yang, S., Wang, H., Ma, D., Zhang, J., Gou, M., Bu, D., Zhang, T.,  
936 *et al.* (2016). Stabilizing mutations of KLHL24 ubiquitin ligase cause loss of keratin 14 and  
937 human skin fragility. *Nat Genet* 48, 1508-1516.
- 938 MacDonald, T.T., Monteleone, I., Fantini, M.C., and Monteleone, G. (2011). Regulation of  
939 homeostasis and inflammation in the intestine. *Gastroenterology* 140, 1768-1775.
- 940 Mackenzie, A.E., Lappin, J.E., Taylor, D.L., Nicklin, S.A., and Milligan, G. (2011). GPR35  
941 as a Novel Therapeutic Target. *Front Endocrinol (Lausanne)* 2, 68.
- 942 Maravillas-Montero, J.L., Burkhardt, A.M., Hevezi, P.A., Carnevale, C.D., Smit, M.J., and  
943 Zlotnik, A. (2015). Cutting edge: GPR35/CXCR8 is the receptor of the mucosal chemokine  
944 CXCL17. *J Immunol* 194, 29-33.
- 945 McCarthy, D.J., Chen, Y., and Smyth, G.K. (2012). Differential expression analysis of  
946 multifactor RNA-Seq experiments with respect to biological variation. *Nucleic Acids Res* 40,  
947 4288-4297.
- 948 Melhem, H., Kaya, B., Ayata, C.K., Hruz, P., and Niess, J.H. (2019). Metabolite-Sensing G  
949 Protein-Coupled Receptors Connect the Diet-Microbiota-Metabolites Axis to Inflammatory  
950 Bowel Disease. *Cells* 8.
- 951 Melhem, H., Spalinger, M.R., Cosin-Roger, J., Atrott, K., Lang, S., Wojtal, K.A., Vavricka,  
952 S.R., Rogler, G., and Frey-Wagner, I. (2017). Prdx6 Deficiency Ameliorates DSS Colitis:  
953 Relevance of Compensatory Antioxidant Mechanisms. *J Crohns Colitis* 11, 871-884.
- 954 Milligan, G. (2018). G protein-coupled receptors not currently in the spotlight: free fatty acid  
955 receptor 2 and GPR35. *Br J Pharmacol* 175, 2543-2553.
- 956 Mizoguchi, E., Hachiya, Y., Kawada, M., Nagatani, K., Ogawa, A., Sugimoto, K., Mizoguchi,  
957 A., and Podolsky, D.K. (2008). TNF receptor type I-dependent activation of innate responses  
958 to reduce intestinal damage-associated mortality. *Gastroenterology* 134, 470-480.
- 959 Naito, Y., Takagi, T., Handa, O., Ishikawa, T., Nakagawa, S., Yamaguchi, T., Yoshida, N.,  
960 Minami, M., Kita, M., Imanishi, J., and Yoshikawa, T. (2003). Enhanced intestinal  
961 inflammation induced by dextran sulfate sodium in tumor necrosis factor-alpha deficient  
962 mice. *J Gastroenterol Hepatol* 18, 560-569.
- 963 Neurath, M.F., Fuss, I., Pasparakis, M., Alexopoulou, L., Haralambous, S., Meyer zum  
964 Buschenfelde, K.H., Strober, W., and Kollias, G. (1997). Predominant pathogenic role of  
965 tumor necrosis factor in experimental colitis in mice. *Eur J Immunol* 27, 1743-1750.

966 Nguyen-Chi, M., Laplace-Builhe, B., Travnickova, J., Luz-Crawford, P., Tejedor, G., Phan,  
967 Q.T., Duroux-Richard, I., Levraud, J.P., Kissa, K., Lutfalla, G., *et al.* (2015). Identification of  
968 polarized macrophage subsets in zebrafish. *Elife* 4, e07288.

969 Niess, J.H., Brand, S., Gu, X., Landsman, L., Jung, S., McCormick, B.A., Vyas, J.M., Boes,  
970 M., Ploegh, H.L., Fox, J.G., *et al.* (2005). CX3CR1-mediated dendritic cell access to the  
971 intestinal lumen and bacterial clearance. *Science* 307, 254-258.

972 Noti, M., Corazza, N., Mueller, C., Berger, B., and Brunner, T. (2010). TNF suppresses acute  
973 intestinal inflammation by inducing local glucocorticoid synthesis. *J Exp Med* 207, 1057-  
974 1066.

975 Oh, Y.S., Heo, K., Kim, E.K., Jang, J.H., Bae, S.S., Park, J.B., Kim, Y.H., Song, M., Kim,  
976 S.R., Ryu, S.H., *et al.* (2017). Dynamic relocalization of NHERF1 mediates chemotactic  
977 migration of ovarian cancer cells toward lysophosphatidic acid stimulation. *Exp Mol Med* 49,  
978 e351.

979 Oka, S., Ota, R., Shima, M., Yamashita, A., and Sugiura, T. (2010). GPR35 is a novel  
980 lysophosphatidic acid receptor. *Biochem Biophys Res Commun* 395, 232-237.

981 Peters, L.A., Perrigoue, J., Mortha, A., Iuga, A., Song, W.M., Neiman, E.M., Llewellyn, S.R.,  
982 Di Narzo, A., Kidd, B.A., Telesco, S.E., *et al.* (2017). A functional genomics predictive  
983 network model identifies regulators of inflammatory bowel disease. *Nat Genet* 49, 1437-1449.

984 Pittet, V., Juillerat, P., Mottet, C., Felley, C., Ballabeni, P., Burnand, B., Michetti, P., Vader,  
985 J.P., and Swiss, I.B.D.C.S.G. (2009). Cohort profile: the Swiss Inflammatory Bowel Disease  
986 Cohort Study (SIBDCS). *Int J Epidemiol* 38, 922-931.

987 Plastira, I., Bernhart, E., Goeritzer, M., DeVaney, T., Reicher, H., Hammer, A., Lohberger,  
988 B., Wintersperger, A., Zucol, B., Graier, W.F., *et al.* (2017). Lysophosphatidic acid via LPA-  
989 receptor 5/protein kinase D-dependent pathways induces a motile and pro-inflammatory  
990 microglial phenotype. *J Neuroinflammation* 14, 253.

991 Postler, T.S., and Ghosh, S. (2017). Understanding the Holobiont: How Microbial Metabolites  
992 Affect Human Health and Shape the Immune System. *Cell Metab* 26, 110-130.

993 Present, D.H., Rutgeerts, P., Targan, S., Hanauer, S.B., Mayer, L., van Hogezaand, R.A.,  
994 Podolsky, D.K., Sands, B.E., Braakman, T., DeWoody, K.L., *et al.* (1999). Infliximab for the  
995 treatment of fistulas in patients with Crohn's disease. *N Engl J Med* 340, 1398-1405.

996 Radulovic, K., Ayata, C.K., Mak'Anyengo, R., Lechner, K., Wuggenig, P., Kaya, B., Hruz, P.,  
997 Gomez de Agüero, M., Broz, P., Weigmann, B., and Niess, J.H. (2019). NLRP6 Deficiency in  
998 CD4 T Cells Decreases T Cell Survival Associated with Increased Cell Death. *J Immunol*  
999 203, 544-556.

1000 Reinecker, H.C., Steffen, M., Witthoef, T., Pflueger, I., Schreiber, S., MacDermott, R.P., and  
1001 Raedler, A. (1993). Enhanced secretion of tumour necrosis factor-alpha, IL-6, and IL-1 beta  
1002 by isolated lamina propria mononuclear cells from patients with ulcerative colitis and Crohn's  
1003 disease. *Clin Exp Immunol* 94, 174-181.

1004 Rossini, V., Zhurina, D., Radulovic, K., Manta, C., Walther, P., Riedel, C.U., and Niess, J.H.  
1005 (2014). CX3CR1(+) cells facilitate the activation of CD4 T cells in the colonic lamina propria  
1006 during antigen-driven colitis. *Mucosal Immunol* 7, 533-548.

1007 Sands, B.E., Tremaine, W.J., Sandborn, W.J., Rutgeerts, P.J., Hanauer, S.B., Mayer, L.,  
1008 Targan, S.R., and Podolsky, D.K. (2001). Infliximab in the treatment of severe, steroid-  
1009 refractory ulcerative colitis: a pilot study. *Inflamm Bowel Dis* 7, 83-88.

1010 Schneditz, G., Elias, J.E., Pagano, E., Zaeem Cader, M., Saveljeva, S., Long, K.,  
1011 Mukhopadhyay, S., Arasteh, M., Lawley, T.D., Dougan, G., *et al.* (2019). GPR35 promotes  
1012 glycolysis, proliferation, and oncogenic signaling by engaging with the sodium potassium  
1013 pump. *Sci Signal* 12.

1014 Shouval, D.S., Biswas, A., Goettel, J.A., McCann, K., Conaway, E., Redhu, N.S.,  
1015 Mascanfroni, I.D., Al Adham, Z., Lavoie, S., Ibourk, M., *et al.* (2014). Interleukin-10 receptor  
1016 signaling in innate immune cells regulates mucosal immune tolerance and anti-inflammatory  
1017 macrophage function. *Immunity* 40, 706-719.

1018 Siegel, S.A., Shealy, D.J., Nakada, M.T., Le, J., Woulfe, D.S., Probert, L., Kollias, G.,  
1019 Ghayeb, J., Vilcek, J., and Daddona, P.E. (1995). The mouse/human chimeric monoclonal  
1020 antibody cA2 neutralizes TNF in vitro and protects transgenic mice from cachexia and TNF  
1021 lethality in vivo. *Cytokine* 7, 15-25.

1022 Southern, C., Cook, J.M., Neetoo-Isseljee, Z., Taylor, D.L., Kettleborough, C.A., Merritt, A.,  
1023 Bassoni, D.L., Raab, W.J., Quinn, E., Wehrman, T.S., *et al.* (2013). Screening beta-arrestin  
1024 recruitment for the identification of natural ligands for orphan G-protein-coupled receptors. *J*  
1025 *Biomol Screen* 18, 599-609.

1026 Souza, A.L., Fiorini Aguiar, S.L., Goncalves Miranda, M.C., Lemos, L., Freitas Guimaraes,  
1027 M.A., Reis, D.S., Vieira Barros, P.A., Veloso, E.S., Carvalho, T.G., Ribeiro, F.M., *et al.*  
1028 (2017). Consumption of Diet Containing Free Amino Acids Exacerbates Colitis in Mice.  
1029 *Front Immunol* 8, 1587.

1030 Steinert, A., Linas, I., Kaya, B., Ibrahim, M., Schlitzer, A., Hruz, P., Radulovic, K.,  
1031 Terracciano, L., Macpherson, A.J., and Niess, J.H. (2017). The Stimulation of Macrophages  
1032 with TLR Ligands Supports Increased IL-19 Expression in Inflammatory Bowel Disease  
1033 Patients and in Colitis Models. *J Immunol* 199, 2570-2584.

- 1034 Takeda, Y., Matoba, K., Kawanami, D., Nagai, Y., Akamine, T., Ishizawa, S., Kanazawa, Y.,  
1035 Yokota, T., and Utsunomiya, K. (2019). ROCK2 Regulates Monocyte Migration and Cell to  
1036 Cell Adhesion in Vascular Endothelial Cells. *Int J Mol Sci* 20.
- 1037 Targan, S.R., Hanauer, S.B., van Deventer, S.J., Mayer, L., Present, D.H., Braakman, T.,  
1038 DeWoody, K.L., Schaible, T.F., and Rutgeerts, P.J. (1997). A short-term study of chimeric  
1039 monoclonal antibody cA2 to tumor necrosis factor alpha for Crohn's disease. Crohn's Disease  
1040 cA2 Study Group. *N Engl J Med* 337, 1029-1035.
- 1041 Thorburn, A.N., Macia, L., and Mackay, C.R. (2014). Diet, metabolites, and "western-  
1042 lifestyle" inflammatory diseases. *Immunity* 40, 833-842.
- 1043 Tsukahara, T., Hamouda, N., Utsumi, D., Matsumoto, K., Amagase, K., and Kato, S. (2017).  
1044 G protein-coupled receptor 35 contributes to mucosal repair in mice via migration of colonic  
1045 epithelial cells. *Pharmacol Res* 123, 27-39.
- 1046 Uchimura, Y., Fuhrer, T., Li, H., Lawson, M.A., Zimmermann, M., Yilmaz, B., Zindel, J.,  
1047 Ronchi, F., Sorribas, M., Hapfelmeier, S., *et al.* (2018). Antibodies Set Boundaries Limiting  
1048 Microbial Metabolite Penetration and the Resultant Mammalian Host Response. *Immunity* 49,  
1049 545-559 e545.
- 1050 Wang, J., Simonavicius, N., Wu, X., Swaminath, G., Reagan, J., Tian, H., and Ling, L.  
1051 (2006). Kynurenic acid as a ligand for orphan G protein-coupled receptor GPR35. *J Biol*  
1052 *Chem* 281, 22021-22028.
- 1053 Ye, X., and Chun, J. (2010). Lysophosphatidic acid (LPA) signaling in vertebrate  
1054 reproduction. *Trends Endocrinol Metab* 21, 17-24.
- 1055 Zheng, L., Fisher, G., Miller, R.E., Peschon, J., Lynch, D.H., and Lenardo, M.J. (1995).  
1056 Induction of apoptosis in mature T cells by tumour necrosis factor. *Nature* 377, 348-351.
- 1057 Zigmond, E., Bernshtein, B., Friedlander, G., Walker, C.R., Yona, S., Kim, K.W., Brenner,  
1058 O., Krauthgamer, R., Varol, C., Muller, W., and Jung, S. (2014). Macrophage-restricted  
1059 interleukin-10 receptor deficiency, but not IL-10 deficiency, causes severe spontaneous  
1060 colitis. *Immunity* 40, 720-733.
- 1061

1062 **Figure Legends**

1063 **Figure 1. GPR35 Is Expressed in Colonic Macrophages**

1064 (A) *gpr35b* mRNA expression levels by qRT-PCR normalized to *efla* across the body and  
1065 dissected intestines of zebrafish larvae at 72 hpf and 120 hpf. A.U.; arbitrary units normalized  
1066 to the lower value (body, 72 hpf).

1067 (B) Whole mount in situ hybridization (WISH) to detect *gpr35b* mRNA expression in  
1068 zebrafish larvae at 96 hpf and 120 hpf. Arrows indicate the intestinal bulb; dashed lines  
1069 indicate the intestinal tract. One representative picture is shown from 40 larvae.

1070 (C) *Gpr35* mRNA expression levels by qRT-PCR normalized to *Gapdh* across indicated  
1071 tissues in WT mice.

1072 (D) Ex vivo fluorescence imaging of ileum, distal colon, mesenteric lymph node (MLN),  
1073 isolated lymph follicle (ILF), and Peyer's patch (PP) from *Cx3cr1*-GFP (green) x *Gpr35*-  
1074 tdTomato (red) double reporter mice. The last panel shows colon from WT as the background  
1075 control. LP, lamina propria; IEC, intestinal epithelial cell; TZ, T cell zone; BF, B cell follicle;  
1076 SCS, Subcapsular sinus. Arrows indicate CX3CR1<sup>+</sup> phagocytes that express GPR35. Scale  
1077 bars, 50  $\mu$ m.

1078 (E) Representative *Gpr35*-tdTomato expression by flow cytometry in monocyte subsets  
1079 (Ly6C<sup>high</sup> to Ly6C<sup>low</sup>) and macrophages (MAC) from small intestinal and colonic lamina  
1080 propria (si-LP and co-LP) of *Gpr35*-tdTomato reporter mice (red unfilled histograms) and  
1081 WT mice (gray histograms) as the background control. Numbers in histograms indicate the  
1082 percentage of GPR35-tdTomato<sup>+</sup> cells.

1083 (F) Quantification of data from (E) showing the percentage of GPR35-tdTomato<sup>+</sup> cells in  
1084 monocytes and macrophages in the si-LP and co-LP.

1085 (G) Principal component analysis from RNA sequencing of GPR35-tdTomato-positive  
1086 (GPR35<sup>pos</sup>) and -negative (GPR35<sup>neg</sup>) colon lamina propria (co-LP) macrophages.



1087 (H) Heatmap representation of cytokine expression profiles from RNA sequencing of GPR35-  
1088 tdTomato-positive (pos) and -negative (neg) subpopulations in co-LP macrophages.  
1089 Data are represented as individual values with medians with each dot representing one  
1090 biological replicate. \* $p \leq 0.05$ , \*\* $p \leq 0.01$ , \*\*\* $p \leq 0.001$ , \*\*\*\* $p \leq 0.0001$  by two-way  
1091 ANOVA with Tukey's multiple comparisons test.

1092

1093 **Figure 2. *Gpr35* Expression is Modulated by the Microbiota and Inflammation**

1094 (A) *gpr35b* mRNA expression detected by WISH using a *gpr35b* anti-sense probe in 120 hpf  
1095 zebrafish larvae treated with antibiotics (ABX) or vehicle. Larvae were treated for 48 h  
1096 starting at 72 hpf; antibiotics were diluted in E3 water. Arrowheads indicate the intestinal  
1097 bulb. One representative picture is shown from 40 larvae.

1098 (B) *gpr35* mRNA expression levels by qRT-PCR normalized to *ef1a* across the body and  
1099 dissected intestines from WT zebrafish treated with antibiotics or vehicle as described in (A).  
1100 Each dot represents a pool of 10 larvae.

1101 (C) *Gpr35* mRNA expression levels by qRT-PCR normalized to *Hprt* in intestinal epithelial  
1102 cells (IECs) and colonic lamina propria cells (co-LP) from WT mice treated with an  
1103 antibiotics cocktail or vehicle. Antibiotics were administered every 24 h for 10 days by oral  
1104 gavage.

1105 (D) *Gpr35* mRNA expression levels by qRT-PCR normalized to *Hprt* in colonic tissue from  
1106 specific pathogen-free (SPF) and germ-free (GF) mice.

1107 (E) *gpr35b* mRNA expression detected by WISH in 120 hpf zebrafish larvae treated with  
1108 TNBS or vehicle. Larvae were treated for 48 h starting at 72 hpf; TNBS was diluted in E3  
1109 water. Arrowheads indicate intestinal bulb and the posterior intestine. One representative  
1110 picture is shown from 20 larvae.

1111 (F) *gpr35b* mRNA expression levels by qRT-PCR normalized to *efla* across the body and  
1112 dissected intestines from WT zebrafish treated with TNBS or vehicle as described in (E).  
1113 Each dot represents a pool of 10 larvae.

1114 (G) Ex vivo fluorescence imaging of colon from untreated (UT) or DSS-treated *Cx3cr1*-GFP  
1115 (green) x *Gpr35*-tdTomato (red) double reporter mice on day 7 of DSS colitis. Scale bars, 50  
1116  $\mu\text{m}$ .

1117 (H) Numbers of GPR35-tdTomato<sup>+</sup> monocytes (Ly6C<sup>high</sup> to Ly6C<sup>low</sup>) and macrophages  
1118 (MAC) quantified by flow cytometry of co-LP from UT and DSS-treated *Gpr35*-tdTomato  
1119 mice.

1120 (I) *gpr35b* mRNA expression levels measured by qRT-PCR normalized to *efla* in WT  
1121 zebrafish exposed to PBS or *V. anguillarum*. Injections of *V. anguillarum* extracts were  
1122 performed in the swim bladder/intestine of 112 hpf anesthetized larvae; tissues were harvested  
1123 6 h post injection to isolate total mRNA. Each dot represents a pool of 10 larvae.

1124 (J) Ex vivo fluorescence imaging of colon from *Cx3cr1*-GFP (green) x *Gpr35*-tdTomato (red)  
1125 mice gavaged with PBS or *E. coli* every other day; tissue collected on day 21. Scale bar, 50  
1126  $\mu\text{m}$ .

1127 (K) Representative *Gpr35*-tdTomato expression by flow cytometry in co-LP macrophages  
1128 from WT (gray histogram), PBS-gavaged *Cx3cr1*-GFP x *Gpr35*-tdTomato (red unfilled  
1129 histogram), and *E. coli*-gavaged *Cx3cr1*-GFP x *Gpr35*-tdTomato (red filled histogram) mice.

1130 (L) Quantification of flow cytometric data from (K) for numbers of GPR35<sup>+</sup> cells in co-LP  
1131 macrophages in PBS-gavaged or *E. coli*-gavaged *Cx3cr1*-GFP x *Gpr35*-tdTomato mice.

1132 (M) *GPR35* mRNA expression by qRT-PCR comparing biopsies from ulcerative colitis (UC)  
1133 or Crohn's disease (CD) patients with quiescent or active disease.

1134 (N) Immunofluorescence imaging of UC or CD patient biopsies taken from non-inflamed  
1135 (left) or inflamed regions (right). Sections were stained for GPR35 (red) and NucBlue (blue)  
1136 for nuclear staining. Scale bars, 50  $\mu\text{m}$ .

1137 (O) Number of GPR35<sup>+</sup> cells in the lamina propria per mm<sup>2</sup> quantified by manual counting of  
1138 immunofluorescence images as shown in (N) of non-inflamed and inflamed UC or CD  
1139 biopsies.

1140 Data are represented as individual values with medians with each dot representing one  
1141 biological replicate. \* $p \leq 0.05$ , \*\* $p \leq 0.01$ , \*\*\* $p \leq 0.001$ , \*\*\*\* $p \leq 0.0001$  by unpaired t-test  
1142 (D), one-way (I) or two-way ANOVA with Tukey's multiple comparisons test (B, C, F, H, O)  
1143 or Mann-Whitney (L, M).

1144

### 1145 **Figure 3. LPA Induces *Tnf* Expression in a GPR35-Dependent Manner**

1146 (A) Relative luminescence unit (RLU) values for intracellular cAMP levels in Gi-coupled  
1147 GPR35-transfected CHO-K1 cells in response to adenylyl cyclase activating-forskolin against  
1148 serial dilutions of zaprinast, KYNA, CXCL17, or LPA. Data are represented as median  $\pm$   
1149 range from doublets with nonlinear fit curves.

1150 (B) mRNA expression levels of *tnf*, *il1b*, and *il17alf* measured by qRT-PCR in untreated (UT)  
1151 or LPA-treated WT or *gpr35b<sup>uu1892</sup>* zebrafish larvae. Larvae were treated for 48 h starting at 72  
1152 hpf. Analysis was performed at 120 hpf and each dot represents a pool of 10 larvae.

1153 (C) mRNA expression levels of *Tnf*, *Il1b*, *Il23a*, and *Il1a* measured by qRT-PCR in UT or  
1154 LPA-treated bone marrow-derived macrophages (BMDMs) derived from WT or *Gpr35<sup>-/-</sup>*  
1155 mice. Results are cumulative of three independent experiments in which each dot represents  
1156 one mouse.

1157 (D) Percentages of migrated BMDMs from WT or *Gpr35*<sup>-/-</sup> mice towards UT control or LPA  
1158 in transwell assay acquired by flow cytometry. Results are cumulative of three independent  
1159 experiments in which each dot represents one mouse.

1160 (E) Macrophage recruitment (mpeg1<sup>+</sup> cells) in *Tg(mpeg1:mCherry)*<sup>WT</sup> and  
1161 *Tg(mpeg1:mCherry)gpr35b<sup>uu1892</sup>* zebrafish larvae injected with DMSO or LPA (10 μM) in the  
1162 otic vesicle (white dashed line). Results are cumulative of two independent experiments in  
1163 which every dot represents one embryo.

1164 (F) Quantification of macrophages recruitment data as shown in (E) for numbers of mpeg1<sup>+</sup>  
1165 cells in otic vesicles of *Tg(mpeg1:mCherry)*-WT and *Tg(mpeg1:mCherry)*-*gpr35b<sup>uu1892</sup>*  
1166 zebrafish larvae injected with PBS or LPA.

1167 Data are represented as individual values with medians. \*p ≤ 0.05, \*\*p ≤ 0.01, \*\*\*p ≤ 0.001,  
1168 \*\*\*\*p ≤ 0.0001 by two-way ANOVA with Tukey's multiple comparisons test.

1169

#### 1170 **Figure 4. Colitis Induces Expression of the LPA-Generating Enzyme Autotaxin**

1171 (A) *Autotaxin (atx)* mRNA expression levels measured by qRT-PCR normalized to *ef1a*  
1172 across the body and dissected intestine of WT zebrafish treated with TNBS or vehicle. Larvae  
1173 were treated for 48 h starting at 72 hpf. Analysis was performed at 120 hpf and each dot  
1174 represents a pool of 10 larvae.

1175 (B) RNA-seq analysis showing *Atx* gene expression from colonic tissue during 2.5% DSS-  
1176 induced colitis (7 days exposure) and recovery. Dots show the average from three different  
1177 mice per data point.

1178 (C) Immunohistochemistry imaging of WT mice treated with 2.5% DSS at indicated  
1179 timepoints. Sections were stained for autotaxin (brown) and H&E (blue). One representative  
1180 experiment is shown from two experiments. Scale bars, 50 μm.

1181 (D) Quantification of autotaxin<sup>+</sup> cell data as shown in (C) from colonic tissue of DSS-treated  
1182 mice at indicated time points. One representative experiment is shown from two experiments.

1183 (E) Quantification of autotaxin<sup>+</sup> cells from colonic tissue at day 0 and day 10 of WT and  
1184 *Gpr35*<sup>-/-</sup> mice treated with DSS.

1185 Data are represented as individual values with mean ± SD. \*p ≤ 0.05, \*\*p ≤ 0.01, \*\*\*p ≤  
1186 0.001 by two-way ANOVA with Tukey's multiple comparisons test.

1187

1188 **Figure 5. Deletion of *Gpr35* in CX3CR1<sup>+</sup> Macrophages Exacerbates DSS-Induced Colitis**

1189 (A) Body weight changes (normalized to initial weight) during DSS colitis for 7 days from  
1190 vehicle-injected (corn oil) or tamoxifen (TMX)-injected *Gpr35*<sup>wt</sup> or *Gpr35*<sup>ΔCx3cr1</sup> mice. Data  
1191 are shown as mean ± SD for four mice per group.

1192 (B) Disease activity scores from daily monitoring of vehicle or TMX-injected *Gpr35*<sup>wt</sup> or  
1193 *Gpr35*<sup>ΔCx3cr1</sup> mice with DSS colitis. Data are shown as mean ± SD for four mice per group.

1194 (C) Representative images of colons from vehicle or TMX-injected *Gpr35*<sup>wt</sup> or *Gpr35*<sup>ΔCx3cr1</sup>  
1195 mice on day 7 of DSS colitis.

1196 (D) Colon lengths on day 7 of DSS colitis from DSS-treated *Gpr35*<sup>wt</sup> or *Gpr35*<sup>ΔCx3cr1</sup> mice  
1197 treated with daily injections of vehicle or TMX.

1198 (E) Endoscopic images and

1199 (F) Representative H&E microscopy images of colons from vehicle or TMX-treated *Gpr35*<sup>wt</sup>  
1200 or *Gpr35*<sup>ΔCx3cr1</sup> mice with DSS colitis. Scale bar, 100 μm.

1201 (G) Histology scores of indicated groups quantified from H&E staining of colon sections as  
1202 shown in F. Each dot represents one animal with medians unless stated otherwise. \*p ≤ 0.05,

1203 \*\*p ≤ 0.01, \*\*\*p ≤ 0.001, \*\*\*\*p ≤ 0.0001 by two-way ANOVA with Tukey's multiple

1204 comparisons test (A, B) or Mann-Whitney (D, G).

1205

1206 **Figure 6. Deletion of *Gpr35* in CX3CR1<sup>+</sup> Macrophages Is Associated with Reduced TNF**

1207 **Production**

1208 (A) After gating on viable CD45<sup>+</sup>MHC class II<sup>+</sup> CD64<sup>+</sup> cells from vehicle or TMX-treated  
1209 *Gpr35*<sup>wt</sup> or *Gpr35*<sup>ΔCx3cr1</sup> mice TNF-producing colonic lamina propria macrophages (co-LP  
1210 MAC) were analyzed by flow cytometry on day 7 of DSS colitis. Numbers in density plots  
1211 indicate the percentage of TNF<sup>+</sup> cells.

1212 (B) Percentages and mean fluorescence intensity (MFI) of TNF<sup>+</sup> cells in macrophages from  
1213 vehicle or TMX-treated *Gpr35*<sup>wt</sup> or *Gpr35*<sup>ΔCx3cr1</sup> mice based on flow cytometry data on day 7  
1214 of DSS colitis as shown in (A). Data are presented as individual values with medians; each  
1215 dot represents one animal. \*p ≤ 0.05, Mann-Whitney U test.

1216

1217 **Figure 7. TNF Treatment of *Gpr35*<sup>ΔCx3cr1</sup> Mice Attenuates Colitis**

1218 (A) Body weight changes (normalized to initial weight) during 8 days of DSS exposure from  
1219 PBS-injected *Gpr35*<sup>wt</sup> (WT) and PBS- or TNF-injected tamoxifen-treated *Gpr35*<sup>ΔCx3cr1</sup> mice.  
1220 Data are shown as mean ± SD for four mice per group. Disease activity scores assessed by  
1221 daily monitoring of DSS colitis of PBS-injected *Gpr35*<sup>wt</sup> and PBS- or TNF-injected  
1222 tamoxifen-treated *Gpr35*<sup>ΔCx3cr1</sup> mice. Data are shown as mean ± SD for four mice per group.

1223 (B) Colon lengths on day 7 of DSS colitis from PBS-injected *Gpr35*<sup>wt</sup> (WT) and PBS- or  
1224 TNF-injected tamoxifen-treated *Gpr35*<sup>ΔCx3cr1</sup> mice.

1225 (C) Endoscopic images and

1226 (D) Quantified endoscopic scores.

1227 (E) Representative H&E microscopy images of colon of PBS-injected *Gpr35*<sup>wt</sup> and PBS- or  
1228 TNF-injected tamoxifen-treated *Gpr35*<sup>ΔCx3cr1</sup> mice on day 7 of DSS colitis. Scale bar, 50 μm.

1229 (F) histology scores.

1230 (G-H) mRNA expression levels of *Cyp11a1* (G) and *Cyp11b1* (H) relative to *Actb* by qRT-  
1231 PCR in colon from PBS-injected *Gpr35<sup>wt</sup>* and PBS- or TNF-injected tamoxifen-treated  
1232 *Gpr35<sup>ΔCx3cr1</sup>* mice on day 7 of DSS colitis.  
1233 (I) Corticosterone concentration in supernatants of colonic explants of PBS-injected *Gpr35<sup>wt</sup>*  
1234 and PBS- or TNF-injected tamoxifen-treated *Gpr35<sup>ΔCx3cr1</sup>* mice on day 7 of DSS  
1235 colitis normalized to weights of colonic tissues.  
1236 Data are presented as individual values with medians. Each dot represents one biological  
1237 replicate. \* $p \leq 0.05$ , \*\* $p \leq 0.01$ , \*\*\* $p \leq 0.001$ , \*\*\*\* $p \leq 0.0001$  by two-way ANOVA with  
1238 Tukey's multiple comparisons test (A, B) or Mann-Whitney (, D, F, G, H, I).

1239

#### 1240 **Supplemental Information**

1241 Supplemental Information includes a list of the Swiss IBD Cohort Investigators members and  
1242 affiliations, 7 figures, and 3 tables.

1243

#### 1244 **Supplemental Figure Legends**

1245

#### 1246 **Figure S1. Zebrafish, Mouse, and Human GPR35 Proteins**

1247 (A) ClustalW alignment of mouse and human GPR35 with *Gpr35a* and *Gpr35b* paralogs  
1248 identified in zebrafish (red). Alignment scores per pair of sequences were calculated by  
1249 ClustalW.

1250 (B) Phylogenetic tree including protein sequences from human, mouse, and zebrafish *GPR35*  
1251 and *GPR55* orthologs. Analysis was performed by ClustalW.

1252 (C) *gpr35a* and *gpr35b* mRNA levels in the dissected intestine or rest of the body from WT  
1253 zebrafish larvae. Target genes were normalized to *ef1a* housekeeping gene. One  
1254 representative experiment is shown from two experiments.

1255 (D) *GPR35* mRNA levels retrieved from the Human Protein Atlas

1256 (<https://www.proteinatlas.org>).

1257

1258 **Figure S2. *Gpr35* Is Expressed in Colon Tissue in Mice**

1259 (A) Construct design of *Gpr35*-tdTomato reporter mice.

1260 (B) Immunofluorescence staining of GPR35 and secondary antibody control in small intestine

1261 from *Gpr35*-tdTomato mice. Sections were stained for GPR35 (red) and NucBlue (blue) for

1262 nuclear staining. Scale bars, 50  $\mu$ m.

1263 (C) Percentage of *Gpr35*-tdTomato-positive B cells, CD4<sup>+</sup> T cells, CD8<sup>+</sup> T cells, neutrophils,

1264 dendritic cells, NK cells, ILC1 cells, ILC2 cells, and ILC3 cells in the colonic lamina propria

1265 of *Gpr35*-tdTomato reporter mice (red unfilled histograms) and WT mice (gray histograms)

1266 as the background control.

1267 (D) Gating strategy for the analysis of colonic lamina propria monocytes and macrophages.

1268 Lin: lineage to exclude CD3, CD19, and NK1.1<sup>+</sup> cells.

1269 (E) Unsupervised heatmap expression profile from RNA sequencing of *Gpr35*-tdTomato-

1270 positive (Pos) and -negative (Neg) colonic lamina propria macrophages (co-LP MAC).

1271

1272 **Figure S3. Construction of *gpr35b<sup>uu1892</sup>* Mutant Zebrafish**

1273 (A) Schematic representation of the *gpr35b* (ENSDARG00000075877) locus. The

1274 *gpr35b<sup>uu1892</sup>* mutant line was generated by deletion of a 10-bp fragment within exon 2 (blue

1275 box).

1276 (B) Schematic of the resulting Gpr35b proteins from WT or *gpr35b<sup>uu19b2</sup>* mutant fish. Deletion

1277 results in a preliminary stop codon after the first 27 amino acids.

1278

1279 **Figure S4. Design of *Gpr35<sup>-/-</sup>* Mice**



1280 (A) Construct design for production of *Gpr35*<sup>-/-</sup> mice.  
1281 (B) Immunofluorescence staining of GPR35 in colon from *Gpr35*<sup>-/-</sup> (right) and WT mice  
1282 (left). Sections were stained for GPR35 (red) and NucBlue (blue) for nuclear staining. Scale  
1283 bars, 50  $\mu$ m.

1284

### 1285 **Figure S5. *Gpr35*-Deficient Mice Show Exacerbated DSS Colitis**

1286 (A) Percentages of body weight (normalized to initial weight) of untreated (UT) or DSS-  
1287 treated WT or *Gpr35*<sup>-/-</sup> mice. Data are shown as mean  $\pm$  SD for four mice per group.

1288 (B) Disease activity scores assessed daily by monitoring UT or DSS-treated WT or *Gpr35*<sup>-/-</sup>  
1289 mice. Data are shown as mean  $\pm$  SD for four mice per group.

1290 (C) Representative images of colons from UT or DSS-treated WT or *Gpr35*<sup>-/-</sup> mice on day 8.

1291 (D) Colon lengths measured from colon images as shown in (C) of UT or DSS-treated WT or  
1292 *Gpr35*<sup>-/-</sup> mice on day 8.

1293 (E) H&E staining of colon tissue sections from UT or DSS-treated WT or *Gpr35*<sup>-/-</sup> mice taken  
1294 on day 8. Scale bars, 100  $\mu$ m.

1295 (F) Histology scores obtained from H&E staining of colons as shown in E.

1296 Data are represented as individual values, with each dot representing one mouse with medians

1297 (C-F). \* $p < 0.05$ , \*\* $p < 0.01$ , \*\*\*  $< p < 0.001$  by two-way ANOVA with Tukey's multiple

1298 comparisons test (A, B) or Mann-Whitney (D, F).

1299

### 1300 **Figure S6. Design of Conditional *Gpr35*<sup>fllox</sup> Mice**

1301 (A) Construct design for production of *Gpr35*<sup>fllox</sup> mice.

1302 (B) After mating of *Gpr35*<sup>fllox</sup> with *Cx3cr1*<sup>CreER</sup> to obtain *Gpr35* <sup>$\Delta$ Cx3cr1</sup> mice, colon was taken  
1303 from *Gpr35* <sup>$\Delta$ Cx3cr1</sup> mice injected i.p. with vehicle (left) or tamoxifen (right). Sections were

1304 stained for GPR35 (red) and NucBlue (blue) for nuclear staining. Arrowheads indicate  
1305 CX3CR1-YFP<sup>+</sup> macrophages. Scale bars, 50  $\mu$ m.  
1306 (C) Percentages of GPR35<sup>+</sup> cells among CX3CR1-YFP<sup>+</sup> cells. Data are represented as  
1307 individual values, with each dot representing one biological replicate with medians. \* $p \leq 0.05$   
1308 by Mann-Whitney.

1309

1310 **Figure S7. DSS-treated *Gpr35* <sup>$\Delta$ Cx3cr1</sup> mice Have Increased Neutrophil Numbers**

1311 (A-C) Flow cytometric analysis of colonic lamina propria (co-LP) macrophages (MAC),  
1312 dendritic cells (DCs), neutrophils and monocyte subsets (Ly6C<sup>high</sup> to Ly6C<sup>low</sup>) of vehicle-  
1313 treated (corn oil) or tamoxifen (TMX)-treated WT or *Gpr35* <sup>$\Delta$ Cx3cr1</sup> mice on day 7 of DSS  
1314 colitis. Quantification of flow cytometric data (B) for frequency (C) and number of  
1315 macrophages, DCs, Ly6<sup>hi</sup>, Ly6<sup>mid</sup> or Ly6<sup>low</sup> monocytes and neutrophils is shown below.

1316 (D) mRNA expression levels of colonic *Il10*, *Il1b*, *Il6*, and *Tnf* relative to *Actb* by qRT-PCR  
1317 of vehicle- or TMX-treated WT or *Gpr35* <sup>$\Delta$ Cx3cr1</sup> mice on day 7 of DSS colitis.

1318 Data are presented as individual values with each dot representing one animal with medians.

1319 \* $p \leq 0.05$ , \*\* $p \leq 0.01$ , \*\*\* $p \leq 0.001$  by Mann-Whitney.

1320

1321

1322

1323

1324

1325

1326

1327

1328

1329  
1330  
1331  
1332  
1333  
1334  
1335  
1336  
1337  
1338

## Supplemental Tables

### Table S1. Primers

#### qPCR Primers

| Target gene                     | Forward sequence          | Reverse sequence        |
|---------------------------------|---------------------------|-------------------------|
| Mouse <i>Gpr35</i>              | Qiagen Cat no: QT00495411 |                         |
| Mouse <i>Gapdh</i>              | CATCAAGAAGGTGGTGAAGC      | CCTGTTGCTGTAGCCGTATT    |
| Mouse <i>Actb</i>               | TTCTTTGCAGCTCCTTCGTT      | ATGGAGGGGAATACAGCCC     |
| Mouse <i>Tnf</i>                | CCACCACGCTCTTCTGTCTAC     | AGGGTCTGGGCCATAGAACT    |
| Mouse <i>Il1b</i>               | TGTGAAATGCCACCTTTTGA      | GGTCAAAGGTTTGAAGCAG     |
| Mouse <i>Il1a</i>               | CGCTTGAGTCGGCAAAGAAAT     | CTTCCCCTTGCTTGACGTTG    |
| Mouse <i>Il23a</i>              | AATGTGCCCCGTATCCAGTG      | CAAGCAGAACTGGCTGTTGTC   |
| Mouse <i>Il10</i>               | ATCGATTTCTCCCCTGTGAA      | TGTCAAATTCATTCATGGCCT   |
| Mouse <i>Il6</i>                | TCGGAGGCTTAATTACACATGTTCT | GCATCATCGTTGTTCAACAATCA |
| Mouse <i>Cyp11a1</i>            | TGGGGTCCTGTTTAAGAGTTCA    | CTGCTTGATGCGTCTGTGTAA   |
| Mouse <i>Cyp11b1</i>            | Qiagen Cat no: QT01198575 |                         |
| Human <i>GPR35</i>              | Qiagen Cat no: QT02403128 |                         |
| Human <i>GAPDH</i>              | Qiagen Cat no: QT00079247 |                         |
| Zebrafish <i>ef1a</i>           | ACCTACCCTCCTCTTGGTGCG     | GGAACGGTGTGATTGAGGGAA   |
| Zebrafish <i>gpr35a</i>         | TTTGAACAGGGCTTTGCGATG     | GGTCCATTGGGTTTTGGGAC    |
| Zebrafish <i>gpr35b</i>         | TTGCTCCACACAAACCGTCT      | ATATGAACCGGCGTGAAGCA    |
| Zebrafish <i>il17</i>           | CGCCTTGACATACACAACCTT     | AGTAAATGGGTTGGGACTCCA   |
| Zebrafish <i>tnf</i>            | GGAGAGTTGCCTTTACCGCT      | TTGCCCTGGGCTTATGGAG     |
| Zebrafish <i>il1b</i>           | ATCAAACCCCAATCCACAGAGT    | GGCACTGAAGACACCACGTT    |
| Zebrafish <i>il22</i>           | CGATGACTGATACAGCACGA      | TGTGCTCGTCTGATTCCAAG    |
| Zebrafish <i>il10</i>           | TAAAGCACTCCACAACCCCA      | GACCCCTTTTCTTCATCTTTTC  |
| Universal 16S<br>bacterial rRNA | ATTACCGCGGCTGCTGGC        | ACTCCTACGGGAGGCAGCAGT   |

Mouse *Gpr35*

ACAAGGCAGGAACTGTG

CCTAGGGCTCAGGCAGC

**Genotyping primers**

***Gpr35*-dtTomato**

GCCTGGATGCCATCTGTTACTACTAC

GATGCAGCCTCTCTAGTCCAACCTG

GGTCGCTACAGACGTTGTTTGTC

***Gpr35*-KO**

GCAAGGCCCAACATCTATAGCTCA

CACTGTCTTTTGTTGCTGCTGCTGT

TGGGTTTGGCCCTTAGGATGATGTG

***Gpr35*-floxed**

GCAAGGCCCAACATCTATAGCTCA

CACTGTCTTTTGTTGCTGCTGCTGT

TGGGTTTGGCCCTTAGGATGATGTG

GTGGCAGACCATTCCGAAGCTAGAG

1339

1340 **Table S2. Disease Characteristics of Swiss IBD Cohort Study Group Patients Who**

1341 **Provided Biopsies for Expression Analysis**

1342

**Baseline Group Characteristics**

|                                         | <b>Crohn's disease</b>       |                      | <b>Ulcerative colitis</b> |                      |
|-----------------------------------------|------------------------------|----------------------|---------------------------|----------------------|
|                                         | <b>Quiescent (n=20)</b>      | <b>Active (n=11)</b> | <b>Quiescent (n=20)</b>   | <b>Active (n=11)</b> |
| Gender (male/female %, n)               | 60/40 %<br>12 male, 8 female | 36/64 %<br>4 m, 7 f  | 35/65%<br>12 m, 8 f       | 54/45%<br>6 m, 5 f   |
| Median age (range), yr                  | 56 (32-81)                   | 39 (31-71)           | 58 (31-81)                | 53 (24-68)           |
| Mean BMI (SD), kg/m <sup>2</sup>        | 24.15 (3)                    | 25.55 (4.9)          | 24.70 (2.99)              | 23.89 (4.08)         |
| Median age at diagnosis (range), yr     | 33.5 (18-60)                 | 21 (14-34)           | 28.5 (14-65)              | 30 (16-60)           |
| Median disease duration (range), yr     | 21.5 (6-45)                  | 19 (7-37)            | 26 (8-44)                 | 16 (7-38)            |
| <b>CD extent, n (%)</b>                 |                              |                      |                           |                      |
| Ileum isolated                          | 5 (25%)                      | 2 (18%)              |                           |                      |
| Colon isolated                          | 2 (10%)                      | 3 (27%)              |                           |                      |
| Ileocolonic                             | 2 (10%)                      | 5 (46%)              |                           |                      |
| Unknown                                 | 11 (55%)                     | 1 (9%)               |                           |                      |
| <b>UC extent, n (%)</b>                 |                              |                      |                           |                      |
| Proctitis                               |                              |                      | 1 (5%)                    | 1 (10%)              |
| Left-sided colitis                      |                              |                      | 3 (20%)                   | 5 (45%)              |
| Pancolitis                              |                              |                      | 5 (25%)                   | 5 (45%)              |
| Unknown                                 |                              |                      |                           |                      |
| <b>Current medical treatment, n (%)</b> |                              |                      |                           |                      |
| No treatment                            | 5 (25%)                      |                      | 5 (25%)                   | 1 (9%)               |
| 5-ASA                                   | 6 (30%)                      |                      | 13 (65%)                  | 9 (81%)              |

|                       |          |         |          |          |
|-----------------------|----------|---------|----------|----------|
| Steroids              |          | 6 (54%) |          | 4 (36%)  |
| Immunosuppressants    | 11 (55%) | 1 (9%)  | 4 (20%)  | 1 (9%)   |
| Anti-TNF              |          | 1 (9%)  |          | 3 (27%)  |
| <b>Smoking status</b> |          |         |          |          |
| Non-smoker, n (%)     | 12 (60%) | 6 (54%) | 15 (75%) | 9 (81%)  |
| Active smoker, n (%)  | 6 (30%)  | 5 (46%) | 1 (5%)   | 1 (9.5%) |
| Unknown               | 2 (10%)  | 0       | 4 (20%)  | 1 (9.5%) |

1343

1344

1345

1346

1347 **Table S3. Characteristics of Basel IBD patients Who Provided Biopsies for**

1348 **Immunofluorescence**

| Patient ID                | Gender | Age  | BMI  | Age at diagnosis | Smoking status | Location inflamed | Location non-inflamed  | Treatment at time of study    | DAI  |
|---------------------------|--------|------|------|------------------|----------------|-------------------|------------------------|-------------------------------|------|
| <b>Ulcerative colitis</b> |        |      |      |                  |                |                   |                        |                               |      |
| 504                       | F      | 50   | 25.6 | 34               | Unk.           | sigma/rectum      | trans. colon           | none                          | 5    |
| 535                       | F      | 71   | 27.3 | 56               | Unk.           | rectum/sigmoid    | colon                  | none                          | 6    |
| 551                       | F      | 53   | 25   | 37               | Unk.           | rectum            | Unk.                   | Unk.                          | Unk. |
| 619                       | Unk.   | Unk. | Unk. | Unk.             | Unk.           | sigmoid/rectum    | ascend. / trans. colon | None, Salofalk 10 days before | Unk. |
| <b>Crohn's disease</b>    |        |      |      |                  |                |                   |                        |                               |      |
| 558                       | F      | 72   | 19   | 23               | non-smoker     | Unk               | rectum                 | Quantalan, Immodium           | Unk. |
| 568                       | M      | 68   | 32   | 52               | active         | sigmoid           | desc. colon            | Spiricort, Aldactone, Orfiril | 74   |
| 620                       | F      | 69   | 21.6 | 56               | active         | term. Ileum       | ascend. colon          | Unk                           | 70   |

1349 Unk, unknown; DAI, disease activity index

1350

1351 **Swiss IBD Cohort Investigators**

- 1352 Karim Abdelrahman<sup>6</sup>, Gentiana Ademi<sup>7</sup>, Patrick Aepli<sup>8</sup>, Claudia Anderegg<sup>9</sup>, Anca-Teodora  
1353 Antonino<sup>10</sup>, Eva Archanioti<sup>31</sup>, Eviano Arrigoni<sup>11</sup>, Diana Bakker de Jong<sup>3</sup>, Bruno Balsiger<sup>12</sup>,  
1354 Polat Bastürk<sup>3</sup>, Peter Bauerfeind<sup>13</sup>, Andrea Becocci<sup>14</sup>, Dominique Belli<sup>14</sup>, José M. Bengoa<sup>11</sup>,  
1355 Luc Biedermann<sup>15</sup>, Janek Binek<sup>16</sup>, Mirjam Blattmann<sup>15</sup>, Stephan Boehm<sup>17</sup>, Tujana Boldanova<sup>3</sup>,  
1356 Jan Borovicka<sup>7</sup>, Christian P. Braegger<sup>19</sup>, Stephan Brand<sup>7</sup>, Lukas Brügger<sup>20</sup>, Simon Brunner<sup>3</sup>,  
1357 Patrick Bühr<sup>19</sup>, Sabine Burk<sup>15</sup>, Bernard Burnand<sup>21</sup>, Emanuel Burri<sup>22</sup>, Sophie Buyse<sup>23</sup>, Dahlia-  
1358 Thao Cao<sup>24</sup>, Ove Carstens<sup>20</sup>, Dominique H. Criblez<sup>8</sup>, Sophie Cunningham<sup>11</sup>, Fabrizia  
1359 D'Angelo<sup>25</sup>, Philippe de Saussure<sup>11</sup>, Lukas Degen<sup>3</sup>, Joakim Delarive<sup>26</sup>, Christopher Doerig<sup>27</sup>,  
1360 Barbara Dora<sup>15</sup>, Susan Drerup<sup>28</sup>, Mara Egger<sup>21</sup>, Ali El-Wafa<sup>29</sup>, Matthias Engelmann<sup>30</sup>, Jessica  
1361 Ezri<sup>31</sup>, Christian Felley<sup>32</sup>, Markus Fliegner<sup>33</sup>, Nicolas Fournier<sup>21</sup>, Montserrat Fraga<sup>31</sup>, Yannick  
1362 Franc<sup>21</sup>, Remus Frei<sup>7</sup>, Pascal Frei<sup>34</sup>, Michael Fried<sup>15</sup>, Florian Froehlich<sup>35</sup>, Raoul Ivano  
1363 Furlano<sup>36</sup>, Luca Garzoni<sup>37</sup>, Martin Geyer<sup>38</sup>, Laurent Girard<sup>11</sup>, Marc Girardin<sup>39</sup>, Delphine  
1364 Golay<sup>21</sup>, Ignaz Good<sup>40</sup>, Ulrike Graf Bigler<sup>20</sup>, Beat Gysi<sup>41</sup>, Johannes Haarer<sup>7</sup>, Marcel Halama<sup>42</sup>,  
1365 Janine Haldemann<sup>12</sup>, Pius Heer<sup>43</sup>, Benjamin Heimgartner<sup>20</sup>, Beat Helbling<sup>34</sup>, Peter Hengstler<sup>16</sup>,  
1366 Denise Herzog<sup>44</sup>, Cyrill Hess<sup>8</sup>, Roxane Hessler<sup>27</sup>, Klaas Heyland<sup>45</sup>, Thomas Hinterleitner<sup>46</sup>,  
1367 Claudia Hirschi<sup>30</sup>, Petr Hruz<sup>3</sup>, Pascal Juillerat<sup>20</sup>, Stephan Kayser<sup>47</sup>, Céline Keller<sup>48</sup>, Carolina  
1368 Khalid-de Bakker<sup>3</sup>, Christina Knellwolf(-Grieger)<sup>7</sup>, Christoph Knoblauch<sup>49</sup>, Henrik Köhler<sup>9</sup>,  
1369 Rebekka Koller<sup>19</sup>, Claudia Krieger(-Grübel)<sup>7</sup>, Patrizia Künzler<sup>7</sup>, Rachel Kusche<sup>9</sup>, Frank Serge  
1370 Lehmann<sup>43</sup>, Andrew J. Macpherson<sup>20</sup>, Michel H. Maillard<sup>31,48</sup>, Michael Manz<sup>3</sup>, Astrid Marot<sup>21</sup>,  
1371 Rémy Meier<sup>50</sup>, Christa Meyenberger<sup>7</sup>, Pamela Meyer<sup>7</sup>, Pierre Michetti<sup>31,48</sup>, Benjamin  
1372 Misselwitz<sup>15</sup>, Patrick Mosler<sup>51</sup>, Christian Mottet<sup>52</sup>, Christoph Müller<sup>53</sup>, Beat Müllhaupt<sup>15</sup>,  
1373 Leilla Musso<sup>21</sup>, Michaela Neagu<sup>54</sup>, Cristina Nichita<sup>55</sup>, Jan H. Niess<sup>3</sup>, Andreas Nydegger<sup>31,48</sup>,  
1374 Nicole Obialo<sup>15</sup>, Diana Ollo<sup>32</sup>, Cassandra Oropesa<sup>32</sup>, Ulrich Peter<sup>45</sup>, Daniel Peternac<sup>56</sup>, Laetitia  
1375 Marie Petit<sup>32</sup>, Valérie Pittet<sup>21</sup>, Daniel Pohl<sup>15</sup>, Marc Porzner<sup>57</sup>, Claudia Preissler<sup>58</sup>, Nadia  
1376 Raschle<sup>15</sup>, Ronald Rentsch<sup>59</sup>, Sophie Restellini<sup>32</sup>, Alexandre Restellini<sup>39</sup>, Jean-Pierre

1377 Richterich<sup>8</sup>, Frederic Ris<sup>32</sup>, Branislav Risti<sup>60</sup>, Marc Alain Ritz<sup>61</sup>, Gerhard Rogler<sup>15</sup>, Nina  
1378 Röhrich<sup>7</sup>, Jean-Benoît Rossel<sup>21</sup>, Vanessa Rueger<sup>19</sup>, Monica Rusticeanu<sup>20</sup>, Markus Sagmeister<sup>63</sup>,  
1379 Gaby Saner<sup>12</sup>, Bernhard Sauter<sup>64</sup>, Mikael Sawatzki<sup>7</sup>, Michael Scharl<sup>15</sup>, Martin Schelling<sup>7</sup>,  
1380 Susanne Schibli<sup>65</sup>, Hugo Schlauri<sup>66</sup>, Dominique Schluckebier<sup>32</sup>, Sybille Schmid(-Uebelhart)<sup>20</sup>,  
1381 Daniela Schmid<sup>49</sup>, Jean-François Schnegg<sup>67</sup>, Alain Schoepfer<sup>31,48</sup>, Vivianne Seematter<sup>21</sup>, Frank  
1382 Seibold<sup>12</sup>, Mariam Seirafi<sup>68</sup>, Gian-Marco Semadeni<sup>7</sup>, Arne Senning<sup>19</sup>, Christiane Sokollik<sup>65</sup>,  
1383 Joachim Sommer<sup>21</sup>, Johannes Spalinger<sup>8,65</sup>, Holger Spangenberg<sup>69</sup>, Philippe Stadler<sup>70</sup>, Peter  
1384 Staub<sup>71</sup>, Dominic Staudenmann<sup>8</sup>, Volker Stenz<sup>72</sup>, Michael Steuerwald<sup>61</sup>, Alex Straumann<sup>43</sup>,  
1385 Bruno Strebel<sup>20</sup>, Andreas Stulz<sup>8</sup>, Michael Sulz<sup>7</sup>, Aurora Tatu<sup>20</sup>, Michela Tempia-Caliera<sup>73</sup>,  
1386 Amman Thomas<sup>62</sup>, Joël Thorens<sup>74</sup>, Kaspar Truninger<sup>75</sup>, Radu Tutuian<sup>20</sup>, Patrick Urfer<sup>76</sup>,  
1387 Stephan Vavricka<sup>15</sup>, Francesco Viani<sup>77</sup>, Jürg Vöggtlin<sup>61</sup>, Roland Von Känel<sup>15</sup>, Dominique  
1388 Vouillamoz<sup>78</sup>, Rachel Vulliamy<sup>21</sup>, Paul Wiesel<sup>55</sup>, Reiner Wiest<sup>20</sup>, Stefanie Wöhrle<sup>8</sup>, Tina  
1389 Wylie<sup>79</sup>, Samuel Zamora<sup>39</sup>, Silvan Zander<sup>80</sup>, Jonas Zeitz<sup>15</sup>, Dorothee Zimmermann<sup>7</sup>  
1390  
1391 <sup>6</sup>Clinique de Montchoisi, Lausanne, Switzerland; <sup>7</sup>Kantonsspital St. Gallen, St. Gallen,  
1392 Switzerland; <sup>8</sup>Kantonsspital Luzern, Luzern, Switzerland; <sup>9</sup>Kantonsspital Aarau, Klinik für  
1393 Kinder und Jugendliche, Aarau, Switzerland; <sup>10</sup>Hôpital Riviera–Site du Samaritain, Vevey,  
1394 Vaud, Switzerland; <sup>11</sup>GI private practice, Geneva, Switzerland; <sup>12</sup>Gastroenterologische Praxis,  
1395 Bern, Switzerland; <sup>13</sup>Department Gastroenterology and Hepatology, Stadtspital Triemli,  
1396 Zurich, Switzerland; <sup>14</sup>Department of Pediatric, Geneva University Hospital, Geneva,  
1397 Switzerland; <sup>15</sup>Department of Gastroenterology and Hepatology, University Hospital Zurich,  
1398 University of Zurich, Zurich, Switzerland; <sup>16</sup>Gastroenterologie am Rosenberg, St. Gallen,  
1399 Switzerland; <sup>17</sup>Spital Bülach, Bülach, Zurich, Switzerland; <sup>18</sup>Department of Biomedicine,  
1400 University of Basel, Basel, Switzerland; <sup>19</sup>University Children’s Hospital, Zurich,  
1401 Switzerland; <sup>20</sup>Department of Visceral Surgery and Medicine, Bern University Hospital,  
1402 University of Bern, Bern, Switzerland; <sup>21</sup>Institute of Social and Preventive Medicine

1403 (IUMSP), Lausanne University Hospital, Lausanne, Switzerland; <sup>22</sup>Department  
1404 Gastroenterology, Kantonsspital Liestal, Liestal, Switzerland; <sup>23</sup>GI private practice, Yverdon-  
1405 les-Bains, Switzerland; <sup>24</sup>Hôpital Neuchâtelois, La Chaux-de-fonds, Neuchâtel, Switzerland;  
1406 <sup>25</sup>Department Gastroenterology and Hepatology, Geneva University Hospital, Geneva,  
1407 Switzerland; <sup>26</sup>GI private practice, Lausanne, Switzerland; <sup>27</sup>Clinique Cecil, Lausanne,  
1408 Switzerland; <sup>28</sup>Schulthess Clinic, Zurich, Switzerland; <sup>29</sup>GI private practice, La Chaux-de-  
1409 Fonds, Switzerland; <sup>30</sup>Gastropraxis Luzern, Luzern, Switzerland; <sup>31</sup>Service of  
1410 Gastroenterology and Hepatology, Department of Medicine, Centre Hospitalier Universitaire  
1411 Vaudois and University of Lausanne, Lausanne, Switzerland; <sup>32</sup>Centre de Gastroentérologie  
1412 Beaulieu SA, Geneva, Switzerland; <sup>33</sup>Medical Center Sihlcity, Zurich, Switzerland;  
1413 <sup>34</sup>Gastroenterologie Bethanien, Zurich, Switzerland; <sup>35</sup>Hospital of the Canton of Jura,  
1414 Porrentruy And Delémont, Jura, Switzerland; <sup>36</sup>Universitäts-Kinderspital beider Basel  
1415 (UKBB), Basel, Switzerland; <sup>37</sup>Clinique des Grangettes, Geneva University Hospital, Genève,  
1416 Switzerland; <sup>38</sup>GI private practice, Wettingen, Aargau, Switzerland; <sup>39</sup>Groupe Médical  
1417 d'Onex, Onex, Switzerland; <sup>40</sup>Spital Walenstadt, Walenstadt, St. Gallen, Switzerland; <sup>41</sup>GI  
1418 private practice, Reinach, Switzerland; <sup>42</sup>Aerztehaus Fluntern, Zurich, Switzerland; <sup>43</sup>GI  
1419 private practice, Olten, Switzerland; <sup>44</sup>HFR Hôpital fribourgeois–Pédiatrie, Fribourg,  
1420 Switzerland; <sup>45</sup>KSW Kantonsspital Winterthur Kinderklinik, Winterthur, Switzerland; <sup>46</sup>GI  
1421 private practice, Zurich, Switzerland; <sup>47</sup>GI private practice, Luzern, Switzerland;  
1422 <sup>48</sup>Gastroenterology La Source-Beaulieu, Lausanne, Switzerland; <sup>49</sup>Kantonsspital Nidwalden,  
1423 Stans, Nidwalden, Switzerland; <sup>50</sup>AMB – Arztpraxis MagenDarm Basel, Basel, Switzerland;  
1424 <sup>51</sup>Kantonsspital Graubünden, Chur, Switzerland; <sup>52</sup>GI private practice, Sion, Switzerland;  
1425 <sup>53</sup>Division of Experimental Pathology, Institute of Pathology, University of Bern, Bern,  
1426 Switzerland; <sup>54</sup>Spital Tiefenau, Bern, Switzerland; <sup>55</sup>Centre médical d'Epalinges, Epalinges,  
1427 Switzerland; <sup>56</sup>Spital Waid, Zurich, Switzerland; <sup>57</sup>Spital Lachen, Lachen, Switzerland;  
1428 <sup>58</sup>Kantonsspital Olten, Olten, Switzerland; <sup>59</sup>GI private practice, St. Gallen, Switzerland; <sup>60</sup>GI



1429 practice, Dietikon, Switzerland; <sup>61</sup>GI practice, Liestal, Switzerland; <sup>62</sup>GI private practice,  
1430 Waldkirch, St. Gallen, Switzerland; <sup>63</sup>GI private practice, Heerbrugg, Switzerland; <sup>64</sup>Klinik  
1431 Hirslanden Zürich, Zurich, Switzerland; <sup>65</sup>Kinderklinik Bern, Bern University Hospital, Bern,  
1432 Switzerland; <sup>66</sup>Derby Center, Wil, Switzerland; <sup>67</sup>GI private practice, Montreux, Switzerland;  
1433 <sup>68</sup>Clinique La Colline, Geneva, Switzerland; <sup>69</sup>Kantonsspital Wolhusen, Wolhusen,  
1434 Switzerland; <sup>70</sup>GI private practice, Payerne, Switzerland; <sup>71</sup>Spital Heiden Appenzell  
1435 Ausserrhoden, Heiden, Switzerland; <sup>72</sup>Kantonsspital Münsterlingen, Münsterlingen,  
1436 Switzerland; <sup>73</sup>Clinique des Grangettes, Chêne-Bougeries, Switzerland; <sup>74</sup>GI private practice,  
1437 Yverdon, Switzerland; <sup>75</sup>GI private practice, Langenthal, Switzerland; <sup>76</sup>Hirslanden Klinik  
1438 Aarau, Gastro Zentrum, Aarau, Switzerland; <sup>77</sup>Private practice, Vevey, Switzerland; <sup>78</sup>Private  
1439 practice, Pully, Switzerland; <sup>79</sup>Infirmière de Recherche chez CHUV Lausanne University  
1440 Hospital, Lausanne, Switzerland; <sup>80</sup>Spital Limmattal, Schlieren, Switzerland
